# Supplementary material for: Genetic variation of Nigerian cattle inferred from maternal and paternal genetic markers
Source: PeerJ journal article supplement (doi:10.7717/peerj.10607), 2021-03-05

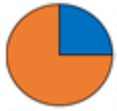

**Egypt**

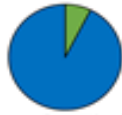

**Guinea**

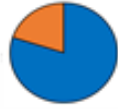

**Angola**

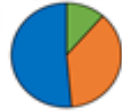

**Mozambique**

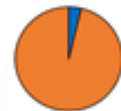

**Kenya**

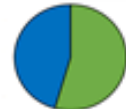

**South Africa**

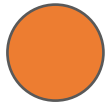

**Mali**

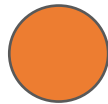

**Burkina  
Faso**

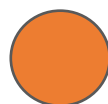

**Nigeria**

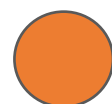

**Central  
Africa  
Republic**

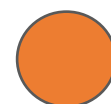

**Ethiopia**

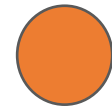

**Lake  
Victoria**

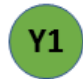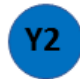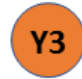

Supplement: Supplemental_Figure_S3.pdf [file Supplemental_Figure_S3.pdf]
