# Supplementary material for: Genetic variation of Nigerian cattle inferred from maternal and paternal genetic markers
Source: PeerJ. 2021 Mar 5;9:e10607. doi: 10.7717/peerj.10607 (PMC7938780; doi:10.7717/peerj.10607)
Supplement: Supplemental Information 5 [file peerj-09-10607-s005.xlsx]

## Sheet: Supplemental Table S1a
Table S1a. The information of all 420 cattle used in this study based on 636 bp of mtDNA D-loop control region
GenBank Accession No.	Haplogroup	Country	Breed/Population	Classification	Continental Origin	Reference
EU177849	T2	Greece	Greek	Bos taurus	Europe	Achilli et al., 2008
EU177852	T2	Greece	Greek	Bos taurus	Europe	Achilli et al., 2008
EU177838	T3	Iran	Iranian	Bos taurus	Middle East, West Asia	Achilli et al., 2008
EU177839	T3	Iran	Iranian	Bos taurus	Middle East, West Asia	Achilli et al., 2008
EU177857	T2	Iran	Iranian	Bos taurus	Middle East, West Asia	Achilli et al., 2008
EU177858	T2	Iran	Iranian	Bos taurus	Middle East, West Asia	Achilli et al., 2008
EU177859	T2	Iran	Iranian	Bos taurus	Middle East, West Asia	Achilli et al., 2008
EU177860	T2	Iran	Iranian	Bos taurus	Middle East, West Asia	Achilli et al., 2008
EU177870	I2	Iran	Iranian	Bos taurus	Middle East, West Asia	Achilli et al., 2008
EU177835	T3	Iraq	Iraqi	Bos taurus	Middle East, West Asia	Achilli et al., 2008
EU177836	T3	Iraq	Iraqi	Bos taurus	Middle East, West Asia	Achilli et al., 2008
EU177837	T3	Iraq	Iraqi	Bos taurus	Middle East, West Asia	Achilli et al., 2008
EU177848	T1a	Iraq	Iraqi	Bos taurus	Middle East, West Asia	Achilli et al., 2008
EU177856	T2	Iraq	Iraqi	Bos taurus	Middle East, West Asia	Achilli et al., 2008
EU177864	T5	Iraq	Iraqi	Bos taurus	Middle East, West Asia	Achilli et al., 2008
EU177865	T5	Iraq	Iraqi	Bos taurus	Middle East, West Asia	Achilli et al., 2008
EU177868	I1	Iraq	Iraqi	Bos taurus	Middle East, West Asia	Achilli et al., 2008
EU177869	I2	Iraq	Iraqi	Bos taurus	Middle East, West Asia	Achilli et al., 2008
EU177815	T3	Italy	Piedmontese	Bos taurus	Europe	Achilli et al., 2008
EU177816	T3	Italy	Chianina	Bos taurus	Europe	Achilli et al., 2008
EU177817	T3	Italy	Valdostana	Bos taurus	Europe	Achilli et al., 2008
EU177818	T3	Italy	Chianina	Bos taurus	Europe	Achilli et al., 2008
EU177819	T3	Italy	Chianina	Bos taurus	Europe	Achilli et al., 2008
EU177820	T3	Italy	Chianina	Bos taurus	Europe	Achilli et al., 2008
EU177821	T3	Italy	Friesian	Bos taurus	Europe	Achilli et al., 2008
EU177822	T3	Italy	Chianina	Bos taurus	Europe	Achilli et al., 2008
EU177823	T3	Italy	Cinisara	Bos taurus	Europe	Achilli et al., 2008
EU177824	T3	Italy	Maremmana	Bos taurus	Europe	Achilli et al., 2008
EU177825	T3	Italy	Chianina	Bos taurus	Europe	Achilli et al., 2008
EU177826	T3	Italy	Friesian	Bos taurus	Europe	Achilli et al., 2008
EU177827	T3	Italy	Friesian	Bos taurus	Europe	Achilli et al., 2008
EU177828	T3	Italy	Chianina	Bos taurus	Europe	Achilli et al., 2008
EU177829	T3	Italy	Maremmana	Bos taurus	Europe	Achilli et al., 2008
EU177830	T3	Italy	Podolica	Bos taurus	Europe	Achilli et al., 2008
EU177831	T3	Italy	Modicana	Bos taurus	Europe	Achilli et al., 2008
EU177832	T3	Italy	Pettiazza	Bos taurus	Europe	Achilli et al., 2008
EU177840	T1'2'3	Italy	Cabannina	Bos taurus	Europe	Achilli et al., 2008
EU177841	T1	Italy	Chianina	Bos taurus	Europe	Achilli et al., 2008
EU177842	T1	Italy	Cinisara	Bos taurus	Europe	Achilli et al., 2008
EU177843	T1a	Italy	Podolica	Bos taurus	Europe	Achilli et al., 2008
EU177844	T1a	Italy	Maremmana	Bos taurus	Europe	Achilli et al., 2008
EU177845	T1a	Italy	Chianina	Bos taurus	Europe	Achilli et al., 2008
EU177846	T1a	Italy	Chianina	Bos taurus	Europe	Achilli et al., 2008
EU177847	T1a	Italy	Friesian	Bos taurus	Europe	Achilli et al., 2008
EU177850	T2	Italy	Cabannina	Bos taurus	Europe	Achilli et al., 2008
EU177851	T2	Italy	Cabannina	Bos taurus	Europe	Achilli et al., 2008
EU177853	T2	Italy	Chianina	Bos taurus	Europe	Achilli et al., 2008
EU177854	T2	Italy	Chianina	Bos taurus	Europe	Achilli et al., 2008
EU177855	T2	Italy	Chianina	Bos taurus	Europe	Achilli et al., 2008
EU177861	T2	Italy	Rendena	Bos taurus	Europe	Achilli et al., 2008
EU177862	T5	Italy	Valdostana	Bos taurus	Europe	Achilli et al., 2008
EU177863	T5	Italy	Piedmontese	Bos taurus	Europe	Achilli et al., 2008
EU177866	Q	Italy	Cabannina	Bos taurus	Europe	Achilli et al., 2008
EU177867	Q	Italy	Cabannina	Bos taurus	Europe	Achilli et al., 2008
EU177833	T3	Spain	Betizuak	Bos taurus	Europe	Achilli et al., 2008
EU177834	T3	Spain	Betizuak	Bos taurus	Europe	Achilli et al., 2008
JN817329	T1f	Egypt	Menofi	Bos taurus	Africa	Bonfiglio et al., 2012
JN817328	T1c	Egypt	Menofi	Bos taurus	Africa	Bonfiglio et al., 2012
JN817327	T1b	Egypt	Menofi	Bos taurus	Africa	Bonfiglio et al., 2012
JN817326	T1c	Egypt	Menofi	Bos taurus	Africa	Bonfiglio et al., 2012
JN817325	T1c	Egypt	Menofi	Bos taurus	Africa	Bonfiglio et al., 2012
JN817324	T1b1	Egypt	Domiaty	Bos taurus	Africa	Bonfiglio et al., 2012
JN817323	T1c1	Egypt	Domiaty	Bos taurus	Africa	Bonfiglio et al., 2012
JN817322	T1c1a1	Egypt	Domiaty	Bos taurus	Africa	Bonfiglio et al., 2012
JN817321	T1d1	Egypt	Domiaty	Bos taurus	Africa	Bonfiglio et al., 2012
JN817349	T1b1	Ethiopia	Sheko	Bos taurus	Africa	Bonfiglio et al., 2012
JN817348	T1b	Ethiopia	Sheko	Bos taurus	Africa	Bonfiglio et al., 2012
JN817305	T1b1	Ethiopia	Boran	Bos indicus	Africa	Bonfiglio et al., 2012
JN817304	T1d1	Ethiopia	Arsi	Bos indicus	Africa	Bonfiglio et al., 2012
JN817302	T1b1	Ethiopia	Arsi	Bos indicus	Africa	Bonfiglio et al., 2012
JN817330	T1d1	Ethiopia	Horro	Bos indicus	Africa	Bonfiglio et al., 2012
JN817303	T1a	Ethiopia	Arsi	Bos indicus	Africa	Bonfiglio et al., 2012
JN817299	T1d	Ethiopia	Boran	Bos indicus	Africa	Bonfiglio et al., 2012
JN817298	T1d	Ethiopia	Abigar	Bos indicus	Africa	Bonfiglio et al., 2012
JN817306	T1e	Italy	Calvana	Bos taurus	Europe	Bonfiglio et al., 2012
JN817312	T1a	Italy	Italian Brown	Bos taurus	Europe	Bonfiglio et al., 2012
JN817300	T1c1	Portugal	Alentejana	Bos taurus	Europe	Bonfiglio et al., 2012
JN817301	T1c1	Portugal	Alentejana	Bos taurus	Europe	Bonfiglio et al., 2012
MT362777	T1a2a	Nigeria	Nigerian cattle/Kaduna	Bos taurus indicus	Africa	Current study
MT362778	T1a	Nigeria	Nigerian cattle/Kaduna	Bos taurus indicus	Africa	Current study
MT362779	T1a	Nigeria	Nigerian cattle/Kaduna	Bos taurus indicus	Africa	Current study
MT362780	T1a	Nigeria	Nigerian cattle/Kaduna	Bos taurus indicus	Africa	Current study
MT362781	T1a	Nigeria	Nigerian cattle/Kaduna	Bos taurus indicus	Africa	Current study
MT362782	T1a	Nigeria	Nigerian cattle/Kaduna	Bos taurus indicus	Africa	Current study
MT362783	T1a	Nigeria	Nigerian cattle/Kaduna	Bos taurus indicus	Africa	Current study
MT362784	T1a	Nigeria	Nigerian cattle/Kaduna	Bos taurus indicus	Africa	Current study
MT362785	T1g	Nigeria	Nigerian cattle/Kaduna	Bos taurus indicus	Africa	Current study
MT362786	T1g	Nigeria	Nigerian cattle/Kaduna	Bos taurus indicus	Africa	Current study
MT362787	T1b1	Nigeria	Nigerian cattle/Kaduna	Bos taurus indicus	Africa	Current study
MT362788	T1g	Nigeria	Nigerian cattle/Kaduna	Bos taurus indicus	Africa	Current study
MT362789	T1a	Nigeria	Nigerian cattle/Kaduna	Bos taurus indicus	Africa	Current study
MT362790	T1b1	Nigeria	Nigerian cattle/Kaduna	Bos taurus indicus	Africa	Current study
MT362791	T1a	Nigeria	Nigerian cattle/Kaduna	Bos taurus indicus	Africa	Current study
MT362792	T1g	Nigeria	Nigerian cattle/Kaduna	Bos taurus indicus	Africa	Current study
MT362793	T1a	Nigeria	Nigerian cattle/Kaduna	Bos taurus indicus	Africa	Current study
MT362794	T1a	Nigeria	Nigerian cattle/Kaduna	Bos taurus indicus	Africa	Current study
MT362795	T1a	Nigeria	Nigerian cattle/Kaduna	Bos taurus indicus	Africa	Current study
MT362796	T1a	Nigeria	Nigerian cattle/Kano	Bos taurus indicus	Africa	Current study
MT362797	T1a	Nigeria	Nigerian cattle/Kano	Bos taurus indicus	Africa	Current study
MT362798	T1a	Nigeria	Nigerian cattle/Kano	Bos taurus indicus	Africa	Current study
MT362799	T1b	Nigeria	Nigerian cattle/Kano	Bos taurus indicus	Africa	Current study
MT362800	T1a	Nigeria	Nigerian cattle/Katsina	Bos taurus indicus	Africa	Current study
MT362801	T1b1	Nigeria	Nigerian cattle/Katsina	Bos taurus indicus	Africa	Current study
MT362802	T1a	Nigeria	Nigerian cattle/Katsina	Bos taurus indicus	Africa	Current study
MT362803	T1g	Nigeria	Nigerian cattle/Katsina	Bos taurus indicus	Africa	Current study
MT362804	T1a	Nigeria	Nigerian cattle/Oyo	Bos taurus indicus	Africa	Current study
MT362805	T1a	Nigeria	Nigerian cattle/Plateau	Bos taurus indicus	Africa	Current study
MT362806	T1a	Nigeria	Nigerian cattle/Plateau	Bos taurus indicus	Africa	Current study
MT362807	T1d	Nigeria	Nigerian cattle/Plateau	Bos taurus indicus	Africa	Current study
MT362808	T1a	Nigeria	Nigerian cattle/Plateau	Bos taurus indicus	Africa	Current study
MT362809	T1b1	Nigeria	Nigerian cattle/Plateau	Bos taurus indicus	Africa	Current study
MT362810	T1b1	Nigeria	Nigerian cattle/Plateau	Bos taurus indicus	Africa	Current study
MT362811	T1g	Nigeria	Nigerian cattle/Plateau	Bos taurus indicus	Africa	Current study
MT362812	T1b1	Nigeria	Nigerian cattle/Plateau	Bos taurus indicus	Africa	Current study
MT362813	T1a	Nigeria	Nigerian cattle/Plateau	Bos taurus indicus	Africa	Current study
MT362814	T1a	Nigeria	Nigerian cattle/Plateau	Bos taurus indicus	Africa	Current study
MT362815	T1a	Nigeria	Nigerian cattle/Plateau	Bos taurus indicus	Africa	Current study
MT362816	T1a	Nigeria	Nigerian cattle/Plateau	Bos taurus indicus	Africa	Current study
MT362817	T1a	Nigeria	Nigerian cattle/Plateau	Bos taurus indicus	Africa	Current study
MT362818	T1a	Nigeria	Nigerian cattle/Plateau	Bos taurus indicus	Africa	Current study
MT362819	T1a	Nigeria	Nigerian cattle/Plateau	Bos taurus indicus	Africa	Current study
MT362820	T1a	Nigeria	Nigerian cattle/Plateau	Bos taurus indicus	Africa	Current study
MT362821	T1a	Nigeria	Nigerian cattle/Plateau	Bos taurus indicus	Africa	Current study
MT362822	T1a	Nigeria	Nigerian cattle/Plateau	Bos taurus indicus	Africa	Current study
MT362823	T1a	Nigeria	Nigerian cattle/Plateau	Bos taurus indicus	Africa	Current study
MT362824	T1a	Nigeria	Nigerian cattle/Plateau	Bos taurus indicus	Africa	Current study
MT362825	T1a	Nigeria	Nigerian cattle/Plateau	Bos taurus indicus	Africa	Current study
MT362826	T1a	Nigeria	Nigerian cattle/Sokoto	Bos taurus indicus	Africa	Current study
MT362827	T1a	Nigeria	Nigerian cattle/Sokoto	Bos taurus indicus	Africa	Current study
MT362828	T1b1	Nigeria	Nigerian cattle/Sokoto	Bos taurus indicus	Africa	Current study
MT362829	T1b1	Nigeria	Nigerian cattle/Sokoto	Bos taurus indicus	Africa	Current study
MT362830	T1a	Nigeria	Nigerian cattle/Sokoto	Bos taurus indicus	Africa	Current study
MT362831	T1b1	Nigeria	Nigerian cattle/Sokoto	Bos taurus indicus	Africa	Current study
MT362832	T1a	Nigeria	Nigerian cattle/Sokoto	Bos taurus indicus	Africa	Current study
MT362833	T1a	Nigeria	Nigerian cattle/Sokoto	Bos taurus indicus	Africa	Current study
MT362834	T1b1	Nigeria	Nigerian cattle/Sokoto	Bos taurus indicus	Africa	Current study
MT362835	T1b1	Nigeria	Nigerian cattle/Sokoto	Bos taurus indicus	Africa	Current study
MT362836	T1a	Nigeria	Nigerian cattle/Sokoto	Bos taurus indicus	Africa	Current study
MT362837	T1b1	Nigeria	Nigerian cattle/Sokoto	Bos taurus indicus	Africa	Current study
MT362838	T1a	Nigeria	Nigerian cattle/Sokoto	Bos taurus indicus	Africa	Current study
MT362839	T1b1	Nigeria	Nigerian cattle/Sokoto	Bos taurus indicus	Africa	Current study
MT362840	T1a	Nigeria	Nigerian cattle/Sokoto	Bos taurus indicus	Africa	Current study
MT362841	T1a	Nigeria	Nigerian cattle/Sokoto	Bos taurus indicus	Africa	Current study
MT362842	T1a	Nigeria	Nigerian cattle/Sokoto	Bos taurus indicus	Africa	Current study
MT362843	T1a	Nigeria	Nigerian cattle/Sokoto	Bos taurus indicus	Africa	Current study
MT362844	T1a	Nigeria	Nigerian cattle/Sokoto	Bos taurus indicus	Africa	Current study
MT362845	T1a	Nigeria	Nigerian cattle/Sokoto	Bos taurus indicus	Africa	Current study
MT362846	T1a	Nigeria	Nigerian cattle/Sokoto	Bos taurus indicus	Africa	Current study
MT362847	T1a	Nigeria	Nigerian cattle/Sokoto	Bos taurus indicus	Africa	Current study
MT362848	T1a	Nigeria	Nigerian cattle/Sokoto	Bos taurus indicus	Africa	Current study
MT362849	T1a	Nigeria	Nigerian cattle/Sokoto	Bos taurus indicus	Africa	Current study
MT362850	T1a	Nigeria	Nigerian cattle/Sokoto	Bos taurus indicus	Africa	Current study
MT362851	T1g	Nigeria	Nigerian cattle/Sokoto	Bos taurus indicus	Africa	Current study
MT362852	T1b1	Nigeria	Nigerian cattle/Sokoto	Bos taurus indicus	Africa	Current study
MT362853	T1g	Nigeria	Nigerian cattle/Taraba	Bos taurus indicus	Africa	Current study
MT362854	T1a	Nigeria	Nigerian cattle/Taraba	Bos taurus indicus	Africa	Current study
MT362855	T1b1	Nigeria	Nigerian cattle/Taraba	Bos taurus indicus	Africa	Current study
MT362856	T1b1	Nigeria	Nigerian cattle/Taraba	Bos taurus indicus	Africa	Current study
MT362857	T1b1	Nigeria	Nigerian cattle/Taraba	Bos taurus indicus	Africa	Current study
MT362858	T1a	Nigeria	Nigerian cattle/Taraba	Bos taurus indicus	Africa	Current study
MT362859	T1a	Nigeria	Nigerian cattle/Taraba	Bos taurus indicus	Africa	Current study
MT362860	T1a	Nigeria	Nigerian cattle/Taraba	Bos taurus indicus	Africa	Current study
MT362861	T1a	Nigeria	Nigerian cattle/Taraba	Bos taurus indicus	Africa	Current study
MT362862	T1a	Nigeria	Nigerian cattle/Taraba	Bos taurus indicus	Africa	Current study
MT362863	T1a	Nigeria	Nigerian cattle/Taraba	Bos taurus indicus	Africa	Current study
MT362864	T1a	Nigeria	Nigerian cattle/Taraba	Bos taurus indicus	Africa	Current study
MT362865	T1d	Nigeria	Nigerian cattle/Taraba	Bos taurus indicus	Africa	Current study
MT362866	T1a2a	Nigeria	Nigerian cattle/Taraba	Bos taurus indicus	Africa	Current study
MT362867	T1b1	Nigeria	Nigerian cattle/Taraba	Bos taurus indicus	Africa	Current study
MT362868	T1a	Nigeria	Nigerian cattle/Taraba	Bos taurus indicus	Africa	Current study
MT362869	T1c1	Nigeria	Nigerian cattle/Taraba	Bos taurus indicus	Africa	Current study
MT362870	T1g	Nigeria	Nigerian cattle/Taraba	Bos taurus indicus	Africa	Current study
MT362871	T1a	Nigeria	Nigerian cattle/Taraba	Bos taurus indicus	Africa	Current study
MT362872	T1a	Nigeria	Nigerian cattle/Taraba	Bos taurus indicus	Africa	Current study
MT362873	T1a2a	Nigeria	Nigerian cattle/Taraba	Bos taurus indicus	Africa	Current study
MT362874	T1a	Nigeria	Nigerian cattle/Taraba	Bos taurus indicus	Africa	Current study
MT362875	T1b1	Nigeria	Nigerian cattle/Taraba	Bos taurus indicus	Africa	Current study
MT362876	T1a	Nigeria	Nigerian cattle/Taraba	Bos taurus indicus	Africa	Current study
MT362877	T1b1	Nigeria	Nigerian cattle/Taraba	Bos taurus indicus	Africa	Current study
MT362878	T1a	Nigeria	Nigerian cattle/Taraba	Bos taurus indicus	Africa	Current study
MT362879	T1b1	Nigeria	Nigerian cattle/Taraba	Bos taurus indicus	Africa	Current study
MT362880	T1a	Nigeria	Nigerian cattle/Taraba	Bos taurus indicus	Africa	Current study
MT362881	T1a	Nigeria	Nigerian cattle/Taraba	Bos taurus indicus	Africa	Current study
MT362882	T1d	Nigeria	Nigerian cattle/Taraba	Bos taurus indicus	Africa	Current study
MT362883	T1a	Nigeria	Nigerian cattle/Taraba	Bos taurus indicus	Africa	Current study
MT362884	T1b1	Nigeria	Nigerian cattle/Taraba	Bos taurus indicus	Africa	Current study
MT362885	T1a	Nigeria	Nigerian cattle/Taraba	Bos taurus indicus	Africa	Current study
MT362886	T1b1	Nigeria	Nigerian cattle/Taraba	Bos taurus indicus	Africa	Current study
MT362887	T1g	Nigeria	Nigerian cattle/Taraba	Bos taurus indicus	Africa	Current study
MT362888	T1a	Nigeria	Nigerian cattle/Zamfara	Bos taurus indicus	Africa	Current study
MT362889	T1a	Nigeria	Nigerian cattle/Zamfara	Bos taurus indicus	Africa	Current study
MT362890	T1b1	Nigeria	Nigerian cattle/Zamfara	Bos taurus indicus	Africa	Current study
MT362891	T1a	Nigeria	Nigerian cattle/Zamfara	Bos taurus indicus	Africa	Current study
MT362892	T1b1	Nigeria	Nigerian cattle/Zamfara	Bos taurus indicus	Africa	Current study
MT362893	T1b1	Nigeria	Nigerian cattle/Zamfara	Bos taurus indicus	Africa	Current study
MT362894	T1g	Nigeria	Nigerian cattle/Zamfara	Bos taurus indicus	Africa	Current study
MT362895	T1g	Nigeria	Nigerian cattle/Zamfara	Bos taurus indicus	Africa	Current study
FJ440722	T1b1	Ethiopia	Sheko	Bos taurus	Africa	Dadi et al., 2009
FJ440723	T1b1	Ethiopia	Sheko	Bos taurus	Africa	Dadi et al., 2009
FJ440724	T1b1b1a1	Ethiopia	Sheko	Bos taurus	Africa	Dadi et al., 2009
FJ440725	T1a	Ethiopia	Sheko	Bos taurus	Africa	Dadi et al., 2009
FJ440726	T1a	Ethiopia	Sheko	Bos taurus	Africa	Dadi et al., 2009
FJ440727	T1b1	Ethiopia	Sheko	Bos taurus	Africa	Dadi et al., 2009
FJ440728	T1	Ethiopia	Sheko	Bos taurus	Africa	Dadi et al., 2009
FJ440729	T1b1	Ethiopia	Sheko	Bos taurus	Africa	Dadi et al., 2009
FJ440730	T1b1	Ethiopia	Sheko	Bos taurus	Africa	Dadi et al., 2009
FJ440731	T1a	Ethiopia	Sheko	Bos taurus	Africa	Dadi et al., 2009
FJ440732	T1a	Ethiopia	Sheko	Bos taurus	Africa	Dadi et al., 2009
FJ440733	T1b1	Ethiopia	Raya-Azebo	Bos taurus	Africa	Dadi et al., 2009
FJ440734	T1b1	Ethiopia	Raya-Azebo	Bos taurus	Africa	Dadi et al., 2009
FJ440735	T1a	Ethiopia	Raya-Azebo	Bos taurus	Africa	Dadi et al., 2009
FJ440736	T1c	Ethiopia	Raya-Azebo	Bos taurus	Africa	Dadi et al., 2009
FJ440737	T1b1	Ethiopia	Raya-Azebo	Bos taurus	Africa	Dadi et al., 2009
FJ440738	T1b1	Ethiopia	Raya-Azebo	Bos taurus	Africa	Dadi et al., 2009
FJ440739	T1b1	Ethiopia	Raya-Azebo	Bos taurus	Africa	Dadi et al., 2009
FJ440740	T1b1	Ethiopia	Raya-Azebo	Bos taurus	Africa	Dadi et al., 2009
FJ440741	T1b1	Ethiopia	Raya-Azebo	Bos taurus	Africa	Dadi et al., 2009
FJ440742	T1a	Ethiopia	Raya-Azebo	Bos taurus	Africa	Dadi et al., 2009
FJ440743	T1b1	Ethiopia	Raya-Azebo	Bos taurus	Africa	Dadi et al., 2009
FJ440744	T1b1	Ethiopia	Raya-Azebo	Bos taurus	Africa	Dadi et al., 2009
FJ440745	T1b1	Ethiopia	Boran	Bos taurus	Africa	Dadi et al., 2009
FJ440746	T1b1	Ethiopia	Boran	Bos taurus	Africa	Dadi et al., 2009
FJ440747	T1a	Ethiopia	Boran	Bos taurus	Africa	Dadi et al., 2009
FJ440748	T1a	Ethiopia	Boran	Bos taurus	Africa	Dadi et al., 2009
FJ440749	T1a	Ethiopia	Boran	Bos taurus	Africa	Dadi et al., 2009
FJ440750	T1b1	Ethiopia	Boran	Bos taurus	Africa	Dadi et al., 2009
FJ440751	T1b1	Ethiopia	Boran	Bos taurus	Africa	Dadi et al., 2009
FJ440752	T1b1	Ethiopia	Boran	Bos taurus	Africa	Dadi et al., 2009
FJ440753	T1b1	Ethiopia	Boran	Bos taurus	Africa	Dadi et al., 2009
FJ440754	T1a	Ethiopia	Boran	Bos taurus	Africa	Dadi et al., 2009
FJ440755	T1b1	Ethiopia	Boran	Bos taurus	Africa	Dadi et al., 2009
FJ440756	T1b1b1a1	Ethiopia	Arsi	Bos taurus	Africa	Dadi et al., 2009
FJ440757	T1a	Ethiopia	Arsi	Bos taurus	Africa	Dadi et al., 2009
FJ440758	T1a	Ethiopia	Arsi	Bos taurus	Africa	Dadi et al., 2009
FJ440759	T1b1	Ethiopia	Arsi	Bos taurus	Africa	Dadi et al., 2009
FJ440760	T1b1	Ethiopia	Arsi	Bos taurus	Africa	Dadi et al., 2009
FJ440761	T1b1b1a2	Ethiopia	Arsi	Bos taurus	Africa	Dadi et al., 2009
FJ440762	T1b1	Ethiopia	Arsi	Bos taurus	Africa	Dadi et al., 2009
FJ440763	T1b1	Ethiopia	Arsi	Bos taurus	Africa	Dadi et al., 2009
FJ440764	T1b1	Ethiopia	Arsi	Bos taurus	Africa	Dadi et al., 2009
FJ440765	T1b1b1a	Ethiopia	Arsi	Bos taurus	Africa	Dadi et al., 2009
FJ440766	T1b1	Ethiopia	Arsi	Bos taurus	Africa	Dadi et al., 2009
FJ440767	T1a	Ethiopia	Ambo	Bos taurus	Africa	Dadi et al., 2009
FJ440768	T1a	Ethiopia	Ambo	Bos taurus	Africa	Dadi et al., 2009
FJ440769	T1b1	Ethiopia	Ambo	Bos taurus	Africa	Dadi et al., 2009
FJ440770	T1b1b1a2	Ethiopia	Ambo	Bos taurus	Africa	Dadi et al., 2009
FJ440771	T1b1	Ethiopia	Ambo	Bos taurus	Africa	Dadi et al., 2009
FJ440772	T1b1	Ethiopia	Ambo	Bos taurus	Africa	Dadi et al., 2009
FJ440773	T1b1b1a3	Ethiopia	Ambo	Bos taurus	Africa	Dadi et al., 2009
FJ440774	T1b1b1a3	Ethiopia	Ambo	Bos taurus	Africa	Dadi et al., 2009
FJ440775	T1a	Ethiopia	Ambo	Bos taurus	Africa	Dadi et al., 2009
FJ440776	T1b1	Ethiopia	Ambo	Bos taurus	Africa	Dadi et al., 2009
FJ440777	T1b1	Ethiopia	Ambo	Bos taurus	Africa	Dadi et al., 2009
FJ440778	T1b1	Ethiopia	Horro	Bos taurus	Africa	Dadi et al., 2009
FJ440779	T1b1	Ethiopia	Horro	Bos taurus	Africa	Dadi et al., 2009
FJ440780	T1b1	Ethiopia	Horro	Bos taurus	Africa	Dadi et al., 2009
FJ440781	T1b1	Ethiopia	Horro	Bos taurus	Africa	Dadi et al., 2009
FJ440782	T1a	Ethiopia	Horro	Bos taurus	Africa	Dadi et al., 2009
FJ440783	T1b1b1a1	Ethiopia	Horro	Bos taurus	Africa	Dadi et al., 2009
FJ440784	T1a	Ethiopia	Horro	Bos taurus	Africa	Dadi et al., 2009
FJ440785	T1b1b1a2	Ethiopia	Horro	Bos taurus	Africa	Dadi et al., 2009
FJ440786	T1a	Ethiopia	Horro	Bos taurus	Africa	Dadi et al., 2009
FJ440787	T1b1b1a	Ethiopia	Horro	Bos taurus	Africa	Dadi et al., 2009
FJ440788	T1b1	Ethiopia	Horro	Bos taurus	Africa	Dadi et al., 2009
FJ440789	T1a	Ethiopia	Horro	Bos taurus	Africa	Dadi et al., 2009
FJ440790	T1b1c	Ethiopia	Horro	Bos taurus	Africa	Dadi et al., 2009
FJ440791	T1b1b1a	Ethiopia	Ogaden	Bos taurus	Africa	Dadi et al., 2009
FJ440792	T1b1	Ethiopia	Ogaden	Bos taurus	Africa	Dadi et al., 2009
FJ440793	T1b1	Ethiopia	Ogaden	Bos taurus	Africa	Dadi et al., 2009
FJ440794	T1b1	Ethiopia	Ogaden	Bos taurus	Africa	Dadi et al., 2009
FJ440795	T1a	Ethiopia	Ogaden	Bos taurus	Africa	Dadi et al., 2009
FJ440796	T1b1	Ethiopia	Ogaden	Bos taurus	Africa	Dadi et al., 2009
FJ440797	T1b1	Ethiopia	Ogaden	Bos taurus	Africa	Dadi et al., 2009
FJ440798	T1b1	Ethiopia	Ogaden	Bos taurus	Africa	Dadi et al., 2009
FJ440799	T1b1b1a2	Ethiopia	Ogaden	Bos taurus	Africa	Dadi et al., 2009
FJ440800	T1b1b1a2	Ethiopia	Ogaden	Bos taurus	Africa	Dadi et al., 2009
FJ440801	T1a	Ethiopia	Ogaden	Bos taurus	Africa	Dadi et al., 2009
FJ440802	T1b1	Ethiopia	Ogaden	Bos taurus	Africa	Dadi et al., 2009
FJ440803	T1a	Ethiopia	Ogaden	Bos taurus	Africa	Dadi et al., 2009
FJ440804	T1a	Ethiopia	Adaw	Bos taurus	Africa	Dadi et al., 2009
FJ440805	T1a	Ethiopia	Adaw	Bos taurus	Africa	Dadi et al., 2009
FJ440806	T1b1	Ethiopia	Adaw	Bos taurus	Africa	Dadi et al., 2009
FJ440807	T1a	Ethiopia	Adaw	Bos taurus	Africa	Dadi et al., 2009
FJ440808	T1b1	Ethiopia	Adaw	Bos taurus	Africa	Dadi et al., 2009
FJ440809	T1b1c	Ethiopia	Adaw	Bos taurus	Africa	Dadi et al., 2009
FJ440810	T1d1	Ethiopia	Adaw	Bos taurus	Africa	Dadi et al., 2009
FJ440811	T1a	Ethiopia	Adaw	Bos taurus	Africa	Dadi et al., 2009
FJ440812	T1b1	Ethiopia	Adaw	Bos taurus	Africa	Dadi et al., 2009
FJ440813	T1b1	Ethiopia	Adaw	Bos taurus	Africa	Dadi et al., 2009
FJ440814	T1b1a	Ethiopia	Adaw	Bos taurus	Africa	Dadi et al., 2009
FJ440815	T1b1b1a	Ethiopia	Adaw	Bos taurus	Africa	Dadi et al., 2009
FJ440816	T1a	Ethiopia	Fogera	Bos taurus	Africa	Dadi et al., 2009
FJ440817	T1b1b1a2	Ethiopia	Fogera	Bos taurus	Africa	Dadi et al., 2009
FJ440818	T1b1	Ethiopia	Fogera	Bos taurus	Africa	Dadi et al., 2009
FJ440819	T1b1b1a1	Ethiopia	Fogera	Bos taurus	Africa	Dadi et al., 2009
FJ440820	T1b1	Ethiopia	Fogera	Bos taurus	Africa	Dadi et al., 2009
FJ440821	T1b1	Ethiopia	Fogera	Bos taurus	Africa	Dadi et al., 2009
FJ440822	T1b1	Ethiopia	Fogera	Bos taurus	Africa	Dadi et al., 2009
FJ440823	T1a	Ethiopia	Fogera	Bos taurus	Africa	Dadi et al., 2009
FJ440824	T1b1	Ethiopia	Fogera	Bos taurus	Africa	Dadi et al., 2009
FJ440825	T1b1b1a	Ethiopia	Fogera	Bos taurus	Africa	Dadi et al., 2009
FJ440826	T1b1	Ethiopia	Fogera	Bos taurus	Africa	Dadi et al., 2009
FJ440827	T1a	Ethiopia	Danakil	Bos taurus	Africa	Dadi et al., 2009
FJ440828	T1b1	Ethiopia	Danakil	Bos taurus	Africa	Dadi et al., 2009
FJ440829	T1a	Ethiopia	Danakil	Bos taurus	Africa	Dadi et al., 2009
FJ440830	T1a	Ethiopia	Danakil	Bos taurus	Africa	Dadi et al., 2009
FJ440831	T1a2a	Ethiopia	Danakil	Bos taurus	Africa	Dadi et al., 2009
FJ440832	T1b1	Ethiopia	Danakil	Bos taurus	Africa	Dadi et al., 2009
FJ440833	T1a	Ethiopia	Danakil	Bos taurus	Africa	Dadi et al., 2009
FJ440834	T1b1	Ethiopia	Danakil	Bos taurus	Africa	Dadi et al., 2009
FJ440835	T1b1b1a	Ethiopia	Danakil	Bos taurus	Africa	Dadi et al., 2009
FJ440836	T1b1b1a	Ethiopia	Danakil	Bos taurus	Africa	Dadi et al., 2009
FJ440837	T1b1	Ethiopia	Danakil	Bos taurus	Africa	Dadi et al., 2009
FJ440838	T1b1	Ethiopia	Danakil	Bos taurus	Africa	Dadi et al., 2009
JQ684029	T1c	Mozambique	Landim	Bos taurus	Africa	Deposited in GenBank
JQ684030	T1b1	Mozambique	Landim	Bos taurus	Africa	Deposited in GenBank
JQ684032	T1b1	Mozambique	Landim	Bos taurus	Africa	Deposited in GenBank
JQ684033	T1b1	Mozambique	Landim	Bos taurus	Africa	Deposited in GenBank
JQ684034	T1b1	Mozambique	Landim	Bos taurus	Africa	Deposited in GenBank
JQ684035	T1b1	Mozambique	Angone	Bos taurus	Africa	Deposited in GenBank
JQ684036	T1b1b1a2	Mozambique	Angone	Bos taurus	Africa	Deposited in GenBank
JQ684037	T1b1b1a2	Mozambique	Angone	Bos taurus	Africa	Deposited in GenBank
JQ684038	T1a	Mozambique	Angone	Bos taurus	Africa	Deposited in GenBank
JQ684039	T1a	Mozambique	Angone	Bos taurus	Africa	Deposited in GenBank
JQ684040	T1b1	Mozambique	Angone	Bos taurus	Africa	Deposited in GenBank
JQ684041	T1a	Mozambique	Angone	Bos taurus	Africa	Deposited in GenBank
JQ684042	T1b1	Mozambique	Angone	Bos taurus	Africa	Deposited in GenBank
JQ684043	T1a	Mozambique	Tete	Bos taurus	Africa	Deposited in GenBank
JQ684044	T1a	Mozambique	Tete	Bos taurus	Africa	Deposited in GenBank
JQ684045	T1b1	Mozambique	Tete	Bos taurus	Africa	Deposited in GenBank
AF034438	T3		Brown Swiss	Bos taurus	Europe	Deposited in GenBank
AF034439	T3r		Jersey	Bos taurus	Europe	Deposited in GenBank
AF034440	T3r		Ayrshire	Bos taurus	Europe	Deposited in GenBank
AF034441	T3r		Hereford	Bos taurus	Europe	Deposited in GenBank
AF034442	T3r		Simmental	Bos taurus	Europe	Deposited in GenBank
AF034443	T3r		Piedmontaise	Bos taurus	Europe	Deposited in GenBank
AF034444	T3		Canadienne	Bos taurus	Europe	Deposited in GenBank
AF034445	T3		Red Angus	Bos taurus	Europe	Deposited in GenBank
AF034446	T3r		Limousine	Bos taurus	Europe	Deposited in GenBank
AF492351	T3e			Bos taurus	Europe	Hiendleder et al., 2008
KF163094	T1b1b1a	South Africa	Nguni	Bos taurus	Africa	Horsburgh et al., 2013
KF163091	T1b1b1a3	South Africa	Nguni	Bos taurus	Africa	Horsburgh et al., 2013
KF163090	T1b1b1a3	South Africa	Nguni	Bos taurus	Africa	Horsburgh et al., 2013
KF163089	T1b1b1a3	South Africa	Nguni	Bos taurus	Africa	Horsburgh et al., 2013
KF163088	T1b1b1a2a	South Africa	Nguni	Bos taurus	Africa	Horsburgh et al., 2013
KF163086	T1b1b1a	South Africa	Nguni	Bos taurus	Africa	Horsburgh et al., 2013
KF163085	T1b1b1a3a	South Africa	Nguni	Bos taurus	Africa	Horsburgh et al., 2013
KF163083	T1b1b1a3a	South Africa	Nguni	Bos taurus	Africa	Horsburgh et al., 2013
KF163080	T1b1b1a	South Africa	Nguni	Bos taurus	Africa	Horsburgh et al., 2013
KF163079	T1b1b1a	South Africa	Nguni	Bos taurus	Africa	Horsburgh et al., 2013
KF163078	T1b1b1a3a3a	South Africa	Nguni	Bos taurus	Africa	Horsburgh et al., 2013
KF163077	T1b1b1a3a3a	South Africa	Nguni	Bos taurus	Africa	Horsburgh et al., 2013
KF163075	T1b1b1a3	South Africa	Nguni	Bos taurus	Africa	Horsburgh et al., 2013
KF163074	T1b1b1a2	South Africa	Nguni	Bos taurus	Africa	Horsburgh et al., 2013
KF163073	T1b1	South Africa	Nguni	Bos taurus	Africa	Horsburgh et al., 2013
KF163072	T1c	South Africa	Nguni	Bos taurus	Africa	Horsburgh et al., 2013
KF163071	T1b1b1a3a3a	South Africa	Nguni	Bos taurus	Africa	Horsburgh et al., 2013
KF163070	T1b1b1a3	South Africa	Nguni	Bos taurus	Africa	Horsburgh et al., 2013
KF163069	T1b1b1a3	South Africa	Nguni	Bos taurus	Africa	Horsburgh et al., 2013
KF163068	T1b1b1a3	South Africa	Nguni	Bos taurus	Africa	Horsburgh et al., 2013
KF163067	T1b1b1a3	South Africa	Nguni	Bos taurus	Africa	Horsburgh et al., 2013
KF163066	T1b1b1a3	South Africa	Nguni	Bos taurus	Africa	Horsburgh et al., 2013
KF163065	T1b1b1a3a2	South Africa	Nguni	Bos taurus	Africa	Horsburgh et al., 2013
KF163064	T1b1b1a3	South Africa	Nguni	Bos taurus	Africa	Horsburgh et al., 2013
KF163062	T1b1b1a3	South Africa	Nguni	Bos taurus	Africa	Horsburgh et al., 2013
KF163093	T1b1b1a3	South Africa	Nguni	Bos taurus	Africa	Horsburgh et al., 2013
KF163092	T1g	South Africa	Nguni	Bos taurus	Africa	Horsburgh et al., 2013
KF163087	T1b1	South Africa	Nguni	Bos taurus	Africa	Horsburgh et al., 2013
KF163084	T1b1	South Africa	Nguni	Bos taurus	Africa	Horsburgh et al., 2013
KF163082	T1b1	South Africa	Nguni	Bos taurus	Africa	Horsburgh et al., 2013
KF163081	T1g	South Africa	Nguni	Bos taurus	Africa	Horsburgh et al., 2013
KF163076	T1b1	South Africa	Nguni	Bos taurus	Africa	Horsburgh et al., 2013
KF163063	T1b1	South Africa	Nguni	Bos taurus	Africa	Horsburgh et al., 2013
KF163061	T1b1	South Africa	Nguni	Bos taurus	Africa	Horsburgh et al., 2013
AY521094	I1		Holstein	Bos taurus	Europe	Lai et al., 2006
AY521095	T		Holstein	Bos taurus	Europe	Lai et al., 2006
AY521103	T3		Montbeliard	Bos taurus	Europe	Lai et al., 2006
AY521104	T3		Montbeliard	Bos taurus	Europe	Lai et al., 2006
AY521105	T3		Montbeliard	Bos taurus	Europe	Lai et al., 2006
AY521106	T5		Montbeliard	Bos taurus	Europe	Lai et al., 2006
AY521117	T5		Simmental	Bos taurus	Europe	Lai et al., 2006
AY521118	T3		Simmental	Bos taurus	Europe	Lai et al., 2006
AY521119	T3		Simmental	Bos taurus	Europe	Lai et al., 2006
AY521120	T4		Simmental	Bos taurus	Europe	Lai et al., 2006
L27730	T1a	Nigeria	Nigerian cattle/N'Dama/Oyo	Bos taurus	Africa	Loftus et al., 1994
L27731	T1a	Nigeria	Nigerian cattle/N'Dama/Oyo	Bos taurus	Africa	Loftus et al., 1994
L27712	T3r5	Republic of Ireland	Aberdeen Angus	Bos taurus	Europe	Loftus et al., 1994
L27713	T3d	Republic of Ireland	Aberdeen Angus	Bos taurus	Europe	Loftus et al., 1994
L27716	T3	Republic of Ireland	Charolais	Bos taurus	Europe	Loftus et al., 1994
L27717	T3	Republic of Ireland	Charolais	Bos taurus	Europe	Loftus et al., 1994
L27718	T3	Republic of Ireland	Friesian	Bos taurus	Europe	Loftus et al., 1994
L27719	T3r	Republic of Ireland	Friesian	Bos taurus	Europe	Loftus et al., 1994
L27724	T3	Republic of Ireland	Hereford	Bos taurus	Europe	Loftus et al., 1994
L27725	T3r	Republic of Ireland	Hereford	Bos taurus	Europe	Loftus et al., 1994
L27734	T3r5	Republic of Ireland	Simmental	Bos taurus	Europe	Loftus et al., 1994
L27735	T3	Republic of Ireland	Simmental	Bos taurus	Europe	Loftus et al., 1994
L27726	T3		Jersey	Bos taurus	Europe	Loftus et al., 1994
L27727	T3r		Jersey	Bos taurus	Europe	Loftus et al., 1994
KT184471	Q1	Egypt	Domiaty	Bos taurus	Africa	Olivieri et al., 2015
KT184472	Q1	Egypt	Domiaty	Bos taurus	Africa	Olivieri et al., 2015
KT184462	T1a	Egypt	Domiaty	Bos taurus	Africa	Olivieri et al., 2015
KT184463	T1a	Egypt	Domiaty	Bos taurus	Africa	Olivieri et al., 2015
KT184464	T1a	Egypt	Menofi	Bos taurus	Africa	Olivieri et al., 2015
KT184465	T1a	Egypt	Menofi	Bos taurus	Africa	Olivieri et al., 2015
KT184466	T1a	Egypt	Menofi	Bos taurus	Africa	Olivieri et al., 2015
KT184467	T1a	Egypt	Menofi	Bos taurus	Africa	Olivieri et al., 2015
KT184468	T1a	Egypt	Menofi	Bos taurus	Africa	Olivieri et al., 2015
KT184469	T1a	Egypt	Domiaty	Bos taurus	Africa	Olivieri et al., 2015
KT184470	T1c	Egypt	Domiaty	Bos taurus	Africa	Olivieri et al., 2015
KT184456	T2	Egypt	Menofi	Bos taurus	Africa	Olivieri et al., 2015
KT184457	T2	Egypt	Domiaty	Bos taurus	Africa	Olivieri et al., 2015
KT184458	T2	Egypt	Domiaty	Bos taurus	Africa	Olivieri et al., 2015
KT184459	T2	Egypt	Menofi	Bos taurus	Africa	Olivieri et al., 2015
KT184460	T2	Egypt	Domiaty	Bos taurus	Africa	Olivieri et al., 2015
KT184461	T2	Egypt	Menofi	Bos taurus	Africa	Olivieri et al., 2015
KT184451	T3	Egypt	Menofi	Bos taurus	Africa	Olivieri et al., 2015
KT184452	T3	Egypt	Domiaty	Bos taurus	Africa	Olivieri et al., 2015
KT184453	T3	Egypt	Menofi	Bos taurus	Africa	Olivieri et al., 2015
KT184454	T3	Egypt	Menofi	Bos taurus	Africa	Olivieri et al., 2015
KT184455	T3	Egypt	Menofi	Bos taurus	Africa	Olivieri et al., 2015

## Sheet: Supplemental Table S1b
Table S1b. The information of all 609 cattle samples from Africa based on 240 bp of the mtDNA D-loop region
GenBank Accession No.	Haplogroup	Country	Breed/Population	Classification	Continental Origin	Reference
DQ515719	T1b1	Algeria	Algeria Local	Bos taurus	Africa	Beja-Pereira et al., 2006
DQ515718	T1b1	Algeria	Algeria Local	Bos taurus	Africa	Beja-Pereira et al., 2006
DQ515717	T1d	Algeria	Algeria Local	Bos taurus	Africa	Beja-Pereira et al., 2006
DQ515716	T1	Algeria	Algeria Local	Bos taurus	Africa	Beja-Pereira et al., 2006
DQ515715	T1	Algeria	Algeria Local	Bos taurus	Africa	Beja-Pereira et al., 2006
DQ515714	T1b1	Algeria	Algeria Local	Bos taurus	Africa	Beja-Pereira et al., 2006
DQ515713	T1b1	Algeria	Algeria Local	Bos taurus	Africa	Beja-Pereira et al., 2006
DQ515712	T1b1	Algeria	Algeria Local	Bos taurus	Africa	Beja-Pereira et al., 2006
DQ515711	T1b1	Algeria	Algeria Local	Bos taurus	Africa	Beja-Pereira et al., 2006
DQ515710	T1b1	Algeria	Algeria Local	Bos taurus	Africa	Beja-Pereira et al., 2006
DQ515709	T1b1	Algeria	Algeria Local	Bos taurus	Africa	Beja-Pereira et al., 2006
DQ515708	T1b1	Algeria	Algeria Local	Bos taurus	Africa	Beja-Pereira et al., 2006
DQ515707	T1	Algeria	Algeria Local	Bos taurus	Africa	Beja-Pereira et al., 2006
DQ515706	T1b1	Algeria	Algeria Local	Bos taurus	Africa	Beja-Pereira et al., 2006
DQ515705	T1b1	Algeria	Algeria Local	Bos taurus	Africa	Beja-Pereira et al., 2006
DQ515704	T1	Algeria	Algeria Local	Bos taurus	Africa	Beja-Pereira et al., 2006
DQ515703	T1b1	Algeria	Algeria Local	Bos taurus	Africa	Beja-Pereira et al., 2006
DQ515702	T1b	Algeria	Algeria Local	Bos taurus	Africa	Beja-Pereira et al., 2006
DQ515701	T1b1	Algeria	Algeria Local	Bos taurus	Africa	Beja-Pereira et al., 2006
DQ515700	T1b1	Algeria	Algeria Local	Bos taurus	Africa	Beja-Pereira et al., 2006
DQ515699	T1b1	Algeria	Algeria Local	Bos taurus	Africa	Beja-Pereira et al., 2006
AF336675	T1b1	Benin	Somba	Bos taurus	Africa	Troy et al., 2001
AF336674	T1b1	Benin	Somba	Bos taurus	Africa	Troy et al., 2001
AF336673	T1b1	Benin	Somba	Bos taurus	Africa	Troy et al., 2001
AF336672	T1b1	Benin	Somba	Bos taurus	Africa	Troy et al., 2001
AF336671	T1b1	Benin	Somba	Bos taurus	Africa	Troy et al., 2001
AF336670	T1b1	Benin	Somba	Bos taurus	Africa	Troy et al., 2001
AF336669	T1b1	Benin	Somba	Bos taurus	Africa	Troy et al., 2001
AF336668	T1b1	Benin	Somba	Bos taurus	Africa	Troy et al., 2001
AF336667	T1b1	Benin	Somba	Bos taurus	Africa	Troy et al., 2001
AF336666	T1b1	Benin	Somba	Bos taurus	Africa	Troy et al., 2001
AF336665	T1b1	Benin	Somba	Bos taurus	Africa	Troy et al., 2001
AF336664	T1b1	Benin	Somba	Bos taurus	Africa	Troy et al., 2001
AF336710	T1b1	Cameroon	Namchi	Bos taurus	Africa	Troy et al., 2001
AF336709	T1b1	Cameroon	Namchi	Bos taurus	Africa	Troy et al., 2001
AF336708	T1b1	Cameroon	Namchi	Bos taurus	Africa	Troy et al., 2001
AF336707	T1b1	Cameroon	Namchi	Bos taurus	Africa	Troy et al., 2001
AF336706	T1b1	Cameroon	Namchi	Bos taurus	Africa	Troy et al., 2001
AF336705	T1b1	Cameroon	Namchi	Bos taurus	Africa	Troy et al., 2001
AF336704	T1b1	Cameroon	Namchi	Bos taurus	Africa	Troy et al., 2001
AF336703	T1b1	Cameroon	Namchi	Bos taurus	Africa	Troy et al., 2001
AF336702	T1b1	Cameroon	Namchi	Bos taurus	Africa	Troy et al., 2001
AF336701	T1b1	Cameroon	Namchi	Bos taurus	Africa	Troy et al., 2001
AF336700	T1b1	Cameroon	Namchi	Bos taurus	Africa	Troy et al., 2001
AF336699	T1b1	Cameroon	Namchi	Bos taurus	Africa	Troy et al., 2001
AF336698	T1b1	Cameroon	Kapsiki	Bos taurus	Africa	Troy et al., 2001
AF336697	T1b1	Cameroon	Kapsiki	Bos taurus	Africa	Troy et al., 2001
AF336696	T1b1	Cameroon	Kapsiki	Bos taurus	Africa	Troy et al., 2001
AF336695	T1b1	Cameroon	Kapsiki	Bos taurus	Africa	Troy et al., 2001
AF336694	T1b1	Cameroon	Kapsiki	Bos taurus	Africa	Troy et al., 2001
AF336693	T1b1	Cameroon	Kapsiki	Bos taurus	Africa	Troy et al., 2001
AF336692	T1b1	Cameroon	Kapsiki	Bos taurus	Africa	Troy et al., 2001
AF336691	T1b1	Cameroon	Kapsiki	Bos taurus	Africa	Troy et al., 2001
AF336690	T1b1	Cameroon	Kapsiki	Bos taurus	Africa	Troy et al., 2001
AF336689	T1b1	Cameroon	Kapsiki	Bos taurus	Africa	Troy et al., 2001
AF336688	T1b1	Cameroon	Kapsiki	Bos taurus	Africa	Troy et al., 2001
AF336687	T1b1	Cameroon	Kapsiki	Bos taurus	Africa	Troy et al., 2001
AF336686	T1b1	Cameroon	Kuri	Bos taurus	Africa	Troy et al., 2001
AF336685	T1b1	Cameroon	Kuri	Bos taurus	Africa	Troy et al., 2001
AF336684	T1b1	Cameroon	Kuri	Bos taurus	Africa	Troy et al., 2001
AF336683	T1b1	Cameroon	Kuri	Bos taurus	Africa	Troy et al., 2001
AF336682	T1b1	Cameroon	Kuri	Bos taurus	Africa	Troy et al., 2001
AF336681	T1b1	Cameroon	Kuri	Bos taurus	Africa	Troy et al., 2001
AF336680	T1b1	Cameroon	Kuri	Bos taurus	Africa	Troy et al., 2001
AF336679	T1b1	Cameroon	Kuri	Bos taurus	Africa	Troy et al., 2001
AF336678	T1b1	Cameroon	Kuri	Bos taurus	Africa	Troy et al., 2001
AF336677	T1b1	Cameroon	Kuri	Bos taurus	Africa	Troy et al., 2001
AF336676	T1b1	Cameroon	Kuri	Bos taurus	Africa	Troy et al., 2001
DQ515640	T1b1	Egypt	Egypt Baladi	Bos taurus	Africa	Beja-Pereira et al., 2006
DQ515639	T1c	Egypt	Egypt Baladi	Bos taurus	Africa	Beja-Pereira et al., 2006
DQ515638	T2	Egypt	Egypt Baladi	Bos taurus	Africa	Beja-Pereira et al., 2006
DQ515637	T1b1	Egypt	Egypt Baladi	Bos taurus	Africa	Beja-Pereira et al., 2006
DQ515636	T1b1	Egypt	Egypt Baladi	Bos taurus	Africa	Beja-Pereira et al., 2006
DQ515635	T3	Egypt	Egypt Baladi	Bos taurus	Africa	Beja-Pereira et al., 2006
DQ515634	T3	Egypt	Egypt Baladi	Bos taurus	Africa	Beja-Pereira et al., 2006
DQ515633	T1f	Egypt	Egypt Baladi	Bos taurus	Africa	Beja-Pereira et al., 2006
DQ515632	T2	Egypt	Egypt Baladi	Bos taurus	Africa	Beja-Pereira et al., 2006
DQ515631	T2	Egypt	Egypt Baladi	Bos taurus	Africa	Beja-Pereira et al., 2006
DQ515630	T2	Egypt	Egypt Baladi	Bos taurus	Africa	Beja-Pereira et al., 2006
DQ515629	T1b1	Egypt	Egypt Baladi	Bos taurus	Africa	Beja-Pereira et al., 2006
DQ515628	T3	Egypt	Egypt Baladi	Bos taurus	Africa	Beja-Pereira et al., 2006
DQ515627	T3	Egypt	Egypt Baladi	Bos taurus	Africa	Beja-Pereira et al., 2006
DQ515626	T2	Egypt	Egypt Baladi	Bos taurus	Africa	Beja-Pereira et al., 2006
DQ515625	T1b1	Egypt	Egypt Baladi	Bos taurus	Africa	Beja-Pereira et al., 2006
DQ515624	T1b1	Egypt	Egypt Baladi	Bos taurus	Africa	Beja-Pereira et al., 2006
DQ515623	T1b1	Egypt	Egypt Baladi	Bos taurus	Africa	Beja-Pereira et al., 2006
DQ515622	T1b1	Egypt	Egypt Baladi	Bos taurus	Africa	Beja-Pereira et al., 2006
DQ515621	T1b1	Egypt	Egypt Baladi	Bos taurus	Africa	Beja-Pereira et al., 2006
DQ515620	T1b1	Egypt	Egypt Baladi	Bos taurus	Africa	Beja-Pereira et al., 2006
JN817329	T1f	Egypt	Menofi	Bos taurus	Africa	Bonfiglio et al., 2012
JN817328	T1c	Egypt	Menofi	Bos taurus	Africa	Bonfiglio et al., 2012
JN817327	T1b	Egypt	Menofi	Bos taurus	Africa	Bonfiglio et al., 2012
JN817326	T1c	Egypt	Menofi	Bos taurus	Africa	Bonfiglio et al., 2012
JN817325	T1c	Egypt	Menofi	Bos taurus	Africa	Bonfiglio et al., 2012
JN817324	T1b1	Egypt	Domiaty	Bos taurus	Africa	Bonfiglio et al., 2012
JN817323	T1c1	Egypt	Domiaty	Bos taurus	Africa	Bonfiglio et al., 2012
JN817322	T1c1a1	Egypt	Domiaty	Bos taurus	Africa	Bonfiglio et al., 2012
JN817321	T1d1	Egypt	Domiaty	Bos taurus	Africa	Bonfiglio et al., 2012
KT184471	Q1	Egypt	Domiaty	Bos taurus	Africa	Olivieri et al., 2015
KT184472	Q1	Egypt	Domiaty	Bos taurus	Africa	Olivieri et al., 2015
KT184462	T1a	Egypt	Domiaty	Bos taurus	Africa	Olivieri et al., 2015
KT184463	T1a	Egypt	Domiaty	Bos taurus	Africa	Olivieri et al., 2015
KT184464	T1a	Egypt	Menofi	Bos taurus	Africa	Olivieri et al., 2015
KT184465	T1a	Egypt	Menofi	Bos taurus	Africa	Olivieri et al., 2015
KT184466	T1a	Egypt	Menofi	Bos taurus	Africa	Olivieri et al., 2015
KT184467	T1a	Egypt	Menofi	Bos taurus	Africa	Olivieri et al., 2015
KT184468	T1a	Egypt	Menofi	Bos taurus	Africa	Olivieri et al., 2015
KT184469	T1a	Egypt	Domiaty	Bos taurus	Africa	Olivieri et al., 2015
KT184470	T1c	Egypt	Domiaty	Bos taurus	Africa	Olivieri et al., 2015
KT184456	T2	Egypt	Menofi	Bos taurus	Africa	Olivieri et al., 2015
KT184457	T2	Egypt	Domiaty	Bos taurus	Africa	Olivieri et al., 2015
KT184458	T2	Egypt	Domiaty	Bos taurus	Africa	Olivieri et al., 2015
KT184459	T2	Egypt	Menofi	Bos taurus	Africa	Olivieri et al., 2015
KT184460	T2	Egypt	Domiaty	Bos taurus	Africa	Olivieri et al., 2015
KT184461	T2	Egypt	Menofi	Bos taurus	Africa	Olivieri et al., 2015
KT184451	T3	Egypt	Menofi	Bos taurus	Africa	Olivieri et al., 2015
KT184452	T3	Egypt	Domiaty	Bos taurus	Africa	Olivieri et al., 2015
KT184453	T3	Egypt	Menofi	Bos taurus	Africa	Olivieri et al., 2015
KT184454	T3	Egypt	Menofi	Bos taurus	Africa	Olivieri et al., 2015
KT184455	T3	Egypt	Menofi	Bos taurus	Africa	Olivieri et al., 2015
AF336728	T1b1	Egypt	Egyptian	Bos taurus	Africa	Troy et al., 2001
AF336727	T1b1	Egypt	Egyptian	Bos taurus	Africa	Troy et al., 2001
AF336726	T1b1	Egypt	Egyptian	Bos taurus	Africa	Troy et al., 2001
AF336725	T3	Egypt	Egyptian	Bos taurus	Africa	Troy et al., 2001
AF336724	T1b1	Egypt	Egyptian	Bos taurus	Africa	Troy et al., 2001
AF336723	T1b1	Egypt	Egyptian	Bos taurus	Africa	Troy et al., 2001
AF336722	T3	Egypt	Egyptian	Bos taurus	Africa	Troy et al., 2001
AF336721	T1b1	Egypt	Egyptian	Bos taurus	Africa	Troy et al., 2001
AF336720	T1b1	Egypt	Egyptian	Bos taurus	Africa	Troy et al., 2001
AF336719	T3	Egypt	Egyptian	Bos taurus	Africa	Troy et al., 2001
AF336718	T1b1	Egypt	Egyptian	Bos taurus	Africa	Troy et al., 2001
JN817349	T1b1	Ethiopia	Sheko	Bos taurus	Africa	Bonfiglio et al., 2012
JN817348	T1b	Ethiopia	Sheko	Bos taurus	Africa	Bonfiglio et al., 2012
JN817305	T1b1	Ethiopia	Boran	Bos indicus	Africa	Bonfiglio et al., 2012
JN817304	T1d1	Ethiopia	Arsi	Bos indicus	Africa	Bonfiglio et al., 2012
JN817302	T1b1	Ethiopia	Arsi	Bos indicus	Africa	Bonfiglio et al., 2012
JN817330	T1d1	Ethiopia	Horro	Bos indicus	Africa	Bonfiglio et al., 2012
JN817303	T1a	Ethiopia	Arsi	Bos indicus	Africa	Bonfiglio et al., 2012
JN817299	T1d	Ethiopia	Boran	Bos indicus	Africa	Bonfiglio et al., 2012
JN817298	T1d	Ethiopia	Abigar	Bos indicus	Africa	Bonfiglio et al., 2012
FJ440722	T1b1	Ethiopia	Sheko	Bos taurus	Africa	Dadi et al., 2009
FJ440723	T1b1	Ethiopia	Sheko	Bos taurus	Africa	Dadi et al., 2009
FJ440724	T1b1b1a1	Ethiopia	Sheko	Bos taurus	Africa	Dadi et al., 2009
FJ440725	T1a	Ethiopia	Sheko	Bos taurus	Africa	Dadi et al., 2009
FJ440726	T1a	Ethiopia	Sheko	Bos taurus	Africa	Dadi et al., 2009
FJ440727	T1b1	Ethiopia	Sheko	Bos taurus	Africa	Dadi et al., 2009
FJ440728	T1	Ethiopia	Sheko	Bos taurus	Africa	Dadi et al., 2009
FJ440729	T1b1	Ethiopia	Sheko	Bos taurus	Africa	Dadi et al., 2009
FJ440730	T1b1	Ethiopia	Sheko	Bos taurus	Africa	Dadi et al., 2009
FJ440731	T1a	Ethiopia	Sheko	Bos taurus	Africa	Dadi et al., 2009
FJ440732	T1a	Ethiopia	Sheko	Bos taurus	Africa	Dadi et al., 2009
FJ440733	T1b1	Ethiopia	Raya-Azebo	Bos taurus	Africa	Dadi et al., 2009
FJ440734	T1b1	Ethiopia	Raya-Azebo	Bos taurus	Africa	Dadi et al., 2009
FJ440735	T1a	Ethiopia	Raya-Azebo	Bos taurus	Africa	Dadi et al., 2009
FJ440736	T1c	Ethiopia	Raya-Azebo	Bos taurus	Africa	Dadi et al., 2009
FJ440737	T1b1	Ethiopia	Raya-Azebo	Bos taurus	Africa	Dadi et al., 2009
FJ440738	T1b1	Ethiopia	Raya-Azebo	Bos taurus	Africa	Dadi et al., 2009
FJ440739	T1b1	Ethiopia	Raya-Azebo	Bos taurus	Africa	Dadi et al., 2009
FJ440740	T1b1	Ethiopia	Raya-Azebo	Bos taurus	Africa	Dadi et al., 2009
FJ440741	T1b1	Ethiopia	Raya-Azebo	Bos taurus	Africa	Dadi et al., 2009
FJ440742	T1a	Ethiopia	Raya-Azebo	Bos taurus	Africa	Dadi et al., 2009
FJ440743	T1b1	Ethiopia	Raya-Azebo	Bos taurus	Africa	Dadi et al., 2009
FJ440744	T1b1	Ethiopia	Raya-Azebo	Bos taurus	Africa	Dadi et al., 2009
FJ440745	T1b1	Ethiopia	Boran	Bos taurus	Africa	Dadi et al., 2009
FJ440746	T1b1	Ethiopia	Boran	Bos taurus	Africa	Dadi et al., 2009
FJ440747	T1a	Ethiopia	Boran	Bos taurus	Africa	Dadi et al., 2009
FJ440748	T1a	Ethiopia	Boran	Bos taurus	Africa	Dadi et al., 2009
FJ440749	T1a	Ethiopia	Boran	Bos taurus	Africa	Dadi et al., 2009
FJ440750	T1b1	Ethiopia	Boran	Bos taurus	Africa	Dadi et al., 2009
FJ440751	T1b1	Ethiopia	Boran	Bos taurus	Africa	Dadi et al., 2009
FJ440752	T1b1	Ethiopia	Boran	Bos taurus	Africa	Dadi et al., 2009
FJ440753	T1b1	Ethiopia	Boran	Bos taurus	Africa	Dadi et al., 2009
FJ440754	T1a	Ethiopia	Boran	Bos taurus	Africa	Dadi et al., 2009
FJ440755	T1b1	Ethiopia	Boran	Bos taurus	Africa	Dadi et al., 2009
FJ440756	T1b1b1a1	Ethiopia	Arsi	Bos taurus	Africa	Dadi et al., 2009
FJ440757	T1a	Ethiopia	Arsi	Bos taurus	Africa	Dadi et al., 2009
FJ440758	T1a	Ethiopia	Arsi	Bos taurus	Africa	Dadi et al., 2009
FJ440759	T1b1	Ethiopia	Arsi	Bos taurus	Africa	Dadi et al., 2009
FJ440760	T1b1	Ethiopia	Arsi	Bos taurus	Africa	Dadi et al., 2009
FJ440761	T1b1b1a2	Ethiopia	Arsi	Bos taurus	Africa	Dadi et al., 2009
FJ440762	T1b1	Ethiopia	Arsi	Bos taurus	Africa	Dadi et al., 2009
FJ440763	T1b1	Ethiopia	Arsi	Bos taurus	Africa	Dadi et al., 2009
FJ440764	T1b1	Ethiopia	Arsi	Bos taurus	Africa	Dadi et al., 2009
FJ440765	T1b1b1a	Ethiopia	Arsi	Bos taurus	Africa	Dadi et al., 2009
FJ440766	T1b1	Ethiopia	Arsi	Bos taurus	Africa	Dadi et al., 2009
FJ440767	T1a	Ethiopia	Ambo	Bos taurus	Africa	Dadi et al., 2009
FJ440768	T1a	Ethiopia	Ambo	Bos taurus	Africa	Dadi et al., 2009
FJ440769	T1b1	Ethiopia	Ambo	Bos taurus	Africa	Dadi et al., 2009
FJ440770	T1b1b1a2	Ethiopia	Ambo	Bos taurus	Africa	Dadi et al., 2009
FJ440771	T1b1	Ethiopia	Ambo	Bos taurus	Africa	Dadi et al., 2009
FJ440772	T1b1	Ethiopia	Ambo	Bos taurus	Africa	Dadi et al., 2009
FJ440773	T1b1b1a3	Ethiopia	Ambo	Bos taurus	Africa	Dadi et al., 2009
FJ440774	T1b1b1a3	Ethiopia	Ambo	Bos taurus	Africa	Dadi et al., 2009
FJ440775	T1a	Ethiopia	Ambo	Bos taurus	Africa	Dadi et al., 2009
FJ440776	T1b1	Ethiopia	Ambo	Bos taurus	Africa	Dadi et al., 2009
FJ440777	T1b1	Ethiopia	Ambo	Bos taurus	Africa	Dadi et al., 2009
FJ440778	T1b1	Ethiopia	Horro	Bos taurus	Africa	Dadi et al., 2009
FJ440779	T1b1	Ethiopia	Horro	Bos taurus	Africa	Dadi et al., 2009
FJ440780	T1b1	Ethiopia	Horro	Bos taurus	Africa	Dadi et al., 2009
FJ440781	T1b1	Ethiopia	Horro	Bos taurus	Africa	Dadi et al., 2009
FJ440782	T1a	Ethiopia	Horro	Bos taurus	Africa	Dadi et al., 2009
FJ440783	T1b1b1a1	Ethiopia	Horro	Bos taurus	Africa	Dadi et al., 2009
FJ440784	T1a	Ethiopia	Horro	Bos taurus	Africa	Dadi et al., 2009
FJ440785	T1b1b1a2	Ethiopia	Horro	Bos taurus	Africa	Dadi et al., 2009
FJ440786	T1a	Ethiopia	Horro	Bos taurus	Africa	Dadi et al., 2009
FJ440787	T1b1b1a	Ethiopia	Horro	Bos taurus	Africa	Dadi et al., 2009
FJ440788	T1b1	Ethiopia	Horro	Bos taurus	Africa	Dadi et al., 2009
FJ440789	T1a	Ethiopia	Horro	Bos taurus	Africa	Dadi et al., 2009
FJ440790	T1b1c	Ethiopia	Horro	Bos taurus	Africa	Dadi et al., 2009
FJ440791	T1b1b1a	Ethiopia	Ogaden	Bos taurus	Africa	Dadi et al., 2009
FJ440792	T1b1	Ethiopia	Ogaden	Bos taurus	Africa	Dadi et al., 2009
FJ440793	T1b1	Ethiopia	Ogaden	Bos taurus	Africa	Dadi et al., 2009
FJ440794	T1b1	Ethiopia	Ogaden	Bos taurus	Africa	Dadi et al., 2009
FJ440795	T1a	Ethiopia	Ogaden	Bos taurus	Africa	Dadi et al., 2009
FJ440796	T1b1	Ethiopia	Ogaden	Bos taurus	Africa	Dadi et al., 2009
FJ440797	T1b1	Ethiopia	Ogaden	Bos taurus	Africa	Dadi et al., 2009
FJ440798	T1b1	Ethiopia	Ogaden	Bos taurus	Africa	Dadi et al., 2009
FJ440799	T1b1b1a2	Ethiopia	Ogaden	Bos taurus	Africa	Dadi et al., 2009
FJ440800	T1b1b1a2	Ethiopia	Ogaden	Bos taurus	Africa	Dadi et al., 2009
FJ440801	T1a	Ethiopia	Ogaden	Bos taurus	Africa	Dadi et al., 2009
FJ440802	T1b1	Ethiopia	Ogaden	Bos taurus	Africa	Dadi et al., 2009
FJ440803	T1a	Ethiopia	Ogaden	Bos taurus	Africa	Dadi et al., 2009
FJ440804	T1a	Ethiopia	Adaw	Bos taurus	Africa	Dadi et al., 2009
FJ440805	T1a	Ethiopia	Adaw	Bos taurus	Africa	Dadi et al., 2009
FJ440806	T1b1	Ethiopia	Adaw	Bos taurus	Africa	Dadi et al., 2009
FJ440807	T1a	Ethiopia	Adaw	Bos taurus	Africa	Dadi et al., 2009
FJ440808	T1b1	Ethiopia	Adaw	Bos taurus	Africa	Dadi et al., 2009
FJ440809	T1b1c	Ethiopia	Adaw	Bos taurus	Africa	Dadi et al., 2009
FJ440810	T1d1	Ethiopia	Adaw	Bos taurus	Africa	Dadi et al., 2009
FJ440811	T1a	Ethiopia	Adaw	Bos taurus	Africa	Dadi et al., 2009
FJ440812	T1b1	Ethiopia	Adaw	Bos taurus	Africa	Dadi et al., 2009
FJ440813	T1b1	Ethiopia	Adaw	Bos taurus	Africa	Dadi et al., 2009
FJ440814	T1b1a	Ethiopia	Adaw	Bos taurus	Africa	Dadi et al., 2009
FJ440815	T1b1b1a	Ethiopia	Adaw	Bos taurus	Africa	Dadi et al., 2009
FJ440816	T1a	Ethiopia	Fogera	Bos taurus	Africa	Dadi et al., 2009
FJ440817	T1b1b1a2	Ethiopia	Fogera	Bos taurus	Africa	Dadi et al., 2009
FJ440818	T1b1	Ethiopia	Fogera	Bos taurus	Africa	Dadi et al., 2009
FJ440819	T1b1b1a1	Ethiopia	Fogera	Bos taurus	Africa	Dadi et al., 2009
FJ440820	T1b1	Ethiopia	Fogera	Bos taurus	Africa	Dadi et al., 2009
FJ440821	T1b1	Ethiopia	Fogera	Bos taurus	Africa	Dadi et al., 2009
FJ440822	T1b1	Ethiopia	Fogera	Bos taurus	Africa	Dadi et al., 2009
FJ440823	T1a	Ethiopia	Fogera	Bos taurus	Africa	Dadi et al., 2009
FJ440824	T1b1	Ethiopia	Fogera	Bos taurus	Africa	Dadi et al., 2009
FJ440825	T1b1b1a	Ethiopia	Fogera	Bos taurus	Africa	Dadi et al., 2009
FJ440826	T1b1	Ethiopia	Fogera	Bos taurus	Africa	Dadi et al., 2009
FJ440827	T1a	Ethiopia	Danakil	Bos taurus	Africa	Dadi et al., 2009
FJ440828	T1b1	Ethiopia	Danakil	Bos taurus	Africa	Dadi et al., 2009
FJ440829	T1a	Ethiopia	Danakil	Bos taurus	Africa	Dadi et al., 2009
FJ440830	T1a	Ethiopia	Danakil	Bos taurus	Africa	Dadi et al., 2009
FJ440831	T1a2a	Ethiopia	Danakil	Bos taurus	Africa	Dadi et al., 2009
FJ440832	T1b1	Ethiopia	Danakil	Bos taurus	Africa	Dadi et al., 2009
FJ440833	T1a	Ethiopia	Danakil	Bos taurus	Africa	Dadi et al., 2009
FJ440834	T1b1	Ethiopia	Danakil	Bos taurus	Africa	Dadi et al., 2009
FJ440835	T1b1b1a	Ethiopia	Danakil	Bos taurus	Africa	Dadi et al., 2009
FJ440836	T1b1b1a	Ethiopia	Danakil	Bos taurus	Africa	Dadi et al., 2009
FJ440837	T1b1	Ethiopia	Danakil	Bos taurus	Africa	Dadi et al., 2009
FJ440838	T1b1	Ethiopia	Danakil	Bos taurus	Africa	Dadi et al., 2009
AF336663	T1b1	Guinea	Guinean N'Dama	Bos taurus	Africa	Troy et al., 2001
AF336662	T1b1	Guinea	Guinean N'Dama	Bos taurus	Africa	Troy et al., 2001
AF336661	T1b1	Guinea	Guinean N'Dama	Bos taurus	Africa	Troy et al., 2001
AF336660	T1b1	Guinea	Guinean N'Dama	Bos taurus	Africa	Troy et al., 2001
AF336659	T1b1	Guinea	Guinean N'Dama	Bos taurus	Africa	Troy et al., 2001
AF336658	T1b1	Guinea	Guinean N'Dama	Bos taurus	Africa	Troy et al., 2001
AF336657	T1b1	Guinea	Guinean N'Dama	Bos taurus	Africa	Troy et al., 2001
AF336656	T1b1	Guinea	Guinean N'Dama	Bos taurus	Africa	Troy et al., 2001
AY378138	T1a	Kenya	Butana	Bos taurus	Africa	Deposited in GenBank
AY378140	T1a	Kenya	Butana	Bos taurus	Africa	Deposited in GenBank
DQ515744	T3	Libya	Libyan Local	Bos taurus	Africa	Beja-Pereira et al., 2006
DQ515743	T3	Libya	Libyan Local	Bos taurus	Africa	Beja-Pereira et al., 2006
DQ515742	T3	Libya	Libyan Local	Bos taurus	Africa	Beja-Pereira et al., 2006
DQ515741	T1	Libya	Libyan Local	Bos taurus	Africa	Beja-Pereira et al., 2006
DQ515740	T1b1	Libya	Libyan Local	Bos taurus	Africa	Beja-Pereira et al., 2006
DQ515739	T1b1	Libya	Libyan Local	Bos taurus	Africa	Beja-Pereira et al., 2006
DQ515738	T1b1	Libya	Libyan Local	Bos taurus	Africa	Beja-Pereira et al., 2006
DQ515737	T1b1	Libya	Libyan Local	Bos taurus	Africa	Beja-Pereira et al., 2006
DQ515736	T1b1	Libya	Libyan Local	Bos taurus	Africa	Beja-Pereira et al., 2006
DQ515735	T1b1	Libya	Libyan Local	Bos taurus	Africa	Beja-Pereira et al., 2006
DQ515734	T1a2a	Libya	Libyan Local	Bos taurus	Africa	Beja-Pereira et al., 2006
DQ515733	T1g	Libya	Libyan Local	Bos taurus	Africa	Beja-Pereira et al., 2006
DQ515732	T1b1	Libya	Libyan Local	Bos taurus	Africa	Beja-Pereira et al., 2006
DQ515731	T1b1	Libya	Libyan Local	Bos taurus	Africa	Beja-Pereira et al., 2006
DQ515730	T1b1	Libya	Libyan Local	Bos taurus	Africa	Beja-Pereira et al., 2006
DQ515729	T1b1	Libya	Libyan Local	Bos taurus	Africa	Beja-Pereira et al., 2006
DQ515728	T1b1	Libya	Libyan Local	Bos taurus	Africa	Beja-Pereira et al., 2006
DQ515727	T1c1	Libya	Libyan Local	Bos taurus	Africa	Beja-Pereira et al., 2006
DQ515726	T3	Libya	Libyan Local	Bos taurus	Africa	Beja-Pereira et al., 2006
DQ515725	T1b1	Libya	Libyan Local	Bos taurus	Africa	Beja-Pereira et al., 2006
DQ515724	T1	Libya	Libyan Local	Bos taurus	Africa	Beja-Pereira et al., 2006
DQ515723	T1	Libya	Libyan Local	Bos taurus	Africa	Beja-Pereira et al., 2006
DQ515722	T1b1	Libya	Libyan Local	Bos taurus	Africa	Beja-Pereira et al., 2006
DQ515721	T1b1	Libya	Libyan Local	Bos taurus	Africa	Beja-Pereira et al., 2006
DQ515698	T1	Morocco	Morocco Tidili	Bos taurus	Africa	Beja-Pereira et al., 2006
DQ515697	T1b1	Morocco	Morocco Tidili	Bos taurus	Africa	Beja-Pereira et al., 2006
DQ515696	T1	Morocco	Morocco Tidili	Bos taurus	Africa	Beja-Pereira et al., 2006
DQ515695	T1	Morocco	Morocco Tidili	Bos taurus	Africa	Beja-Pereira et al., 2006
DQ515694	T1b1	Morocco	Morocco Tidili	Bos taurus	Africa	Beja-Pereira et al., 2006
DQ515693	T1b1	Morocco	Morocco Tidili	Bos taurus	Africa	Beja-Pereira et al., 2006
DQ515692	T1a2a	Morocco	Morocco Tidili	Bos taurus	Africa	Beja-Pereira et al., 2006
DQ515691	T1a2a	Morocco	Morocco Tidili	Bos taurus	Africa	Beja-Pereira et al., 2006
DQ515690	T1b1	Morocco	Morocco Tidili	Bos taurus	Africa	Beja-Pereira et al., 2006
DQ515689	T1b1	Morocco	Morocco Tidili	Bos taurus	Africa	Beja-Pereira et al., 2006
DQ515688	T1b1	Morocco	Morocco Tidili	Bos taurus	Africa	Beja-Pereira et al., 2006
DQ515687	T1b1	Morocco	Morocco Tidili	Bos taurus	Africa	Beja-Pereira et al., 2006
DQ515686	T1b1	Morocco	Morocco Tidili	Bos taurus	Africa	Beja-Pereira et al., 2006
DQ515685	T1b1	Morocco	Morocco Tidili	Bos taurus	Africa	Beja-Pereira et al., 2006
DQ515684	T1b1	Morocco	Morocco Tidili	Bos taurus	Africa	Beja-Pereira et al., 2006
DQ515683	T1b1	Morocco	Morocco Tidili	Bos taurus	Africa	Beja-Pereira et al., 2006
DQ515682	T1b1	Morocco	Morocco Tidili	Bos taurus	Africa	Beja-Pereira et al., 2006
DQ515681	T1b1	Morocco	Morocco Tidili	Bos taurus	Africa	Beja-Pereira et al., 2006
DQ515680	T1b1	Morocco	Morocco Tidili	Bos taurus	Africa	Beja-Pereira et al., 2006
DQ515679	T1b1	Morocco	Morocco Tidili	Bos taurus	Africa	Beja-Pereira et al., 2006
DQ515678	T1b1	Morocco	Morocco Tidili	Bos taurus	Africa	Beja-Pereira et al., 2006
DQ515677	T1b1	Morocco	Morocco Tidili	Bos taurus	Africa	Beja-Pereira et al., 2006
DQ515676	T1b1	Morocco	Morocco Olmez	Bos taurus	Africa	Beja-Pereira et al., 2006
DQ515675	T1b1	Morocco	Morocco Olmez	Bos taurus	Africa	Beja-Pereira et al., 2006
DQ515674	T1b1	Morocco	Morocco Olmez	Bos taurus	Africa	Beja-Pereira et al., 2006
DQ515673	T1b1	Morocco	Morocco Olmez	Bos taurus	Africa	Beja-Pereira et al., 2006
DQ515672	T3	Morocco	Morocco Olmez	Bos taurus	Africa	Beja-Pereira et al., 2006
DQ515671	T1b1	Morocco	Morocco Olmez	Bos taurus	Africa	Beja-Pereira et al., 2006
DQ515670	T1b1	Morocco	Morocco Olmez	Bos taurus	Africa	Beja-Pereira et al., 2006
DQ515669	T1c1	Morocco	Morocco Olmez	Bos taurus	Africa	Beja-Pereira et al., 2006
DQ515668	T1c1	Morocco	Morocco Olmez	Bos taurus	Africa	Beja-Pereira et al., 2006
DQ515667	T1c1	Morocco	Morocco Olmez	Bos taurus	Africa	Beja-Pereira et al., 2006
DQ515666	T1c1	Morocco	Morocco Olmez	Bos taurus	Africa	Beja-Pereira et al., 2006
DQ515665	T1c1	Morocco	Morocco Olmez	Bos taurus	Africa	Beja-Pereira et al., 2006
DQ515664	T1c1	Morocco	Morocco Olmez	Bos taurus	Africa	Beja-Pereira et al., 2006
DQ515663	T1c1	Morocco	Morocco Olmez	Bos taurus	Africa	Beja-Pereira et al., 2006
DQ515662	T1a2a	Morocco	Morocco Olmez	Bos taurus	Africa	Beja-Pereira et al., 2006
DQ515661	T1a2a	Morocco	Morocco Olmez	Bos taurus	Africa	Beja-Pereira et al., 2006
DQ515660	T1a2a	Morocco	Morocco Olmez	Bos taurus	Africa	Beja-Pereira et al., 2006
DQ515659	T1a2a	Morocco	Morocco Olmez	Bos taurus	Africa	Beja-Pereira et al., 2006
DQ515658	T1a2a	Morocco	Morocco Olmez	Bos taurus	Africa	Beja-Pereira et al., 2006
DQ515657	T1a2a	Morocco	Morocco Olmez	Bos taurus	Africa	Beja-Pereira et al., 2006
DQ515656	T1a2a	Morocco	Morocco Olmez	Bos taurus	Africa	Beja-Pereira et al., 2006
DQ515655	T1a2a	Morocco	Morocco Olmez	Bos taurus	Africa	Beja-Pereira et al., 2006
DQ515654	T1a2a	Morocco	Morocco Olmez	Bos taurus	Africa	Beja-Pereira et al., 2006
DQ515653	T1a2a	Morocco	Morocco Olmez	Bos taurus	Africa	Beja-Pereira et al., 2006
DQ515652	T1b1	Morocco	Morocco Olmez	Bos taurus	Africa	Beja-Pereira et al., 2006
DQ515651	T1b1	Morocco	Morocco Olmez	Bos taurus	Africa	Beja-Pereira et al., 2006
DQ515650	T1a2a	Morocco	Morocco Blonde Atlas	Bos taurus	Africa	Beja-Pereira et al. 2006
DQ515649	T1b1	Morocco	Morocco Blonde Atlas	Bos taurus	Africa	Beja-Pereira et al., 2006
DQ515648	T1b1	Morocco	Morocco Blonde Atlas	Bos taurus	Africa	Beja-Pereira et al., 2006
DQ515647	T1b1	Morocco	Morocco Blonde Atlas	Bos taurus	Africa	Beja-Pereira et al., 2006
DQ515646	T3	Morocco	Morocco Blonde Atlas	Bos taurus	Africa	Beja-Pereira et al., 2006
DQ515645	T3	Morocco	Morocco Blonde Atlas	Bos taurus	Africa	Beja-Pereira et al., 2006
DQ515644	T1b1	Morocco	Morocco Blonde Atlas	Bos taurus	Africa	Beja-Pereira et al., 2006
DQ515643	T1b1	Morocco	Morocco Blonde Atlas	Bos taurus	Africa	Beja-Pereira et al., 2006
DQ515642	T1b1	Morocco	Morocco Blonde Atlas	Bos taurus	Africa	Beja-Pereira et al., 2006
DQ515641	T1	Morocco	Morocco Blonde Atlas	Bos taurus	Africa	Beja-Pereira et al., 2006
JQ684029	T1c	Mozambique	Landim	Bos taurus	Africa	Deposited in GenBank
JQ684030	T1b1	Mozambique	Landim	Bos taurus	Africa	Deposited in GenBank
JQ684031	T1g	Mozambique	Landim	Bos taurus	Africa	Deposited in GenBank
JQ684032	T1b1	Mozambique	Landim	Bos taurus	Africa	Deposited in GenBank
JQ684033	T1b1	Mozambique	Landim	Bos taurus	Africa	Deposited in GenBank
JQ684034	T1b1	Mozambique	Landim	Bos taurus	Africa	Deposited in GenBank
JQ684035	T1b1	Mozambique	Angone	Bos taurus	Africa	Deposited in GenBank
JQ684036	T1b1b1a2	Mozambique	Angone	Bos taurus	Africa	Deposited in GenBank
JQ684037	T1b1b1a2	Mozambique	Angone	Bos taurus	Africa	Deposited in GenBank
JQ684038	T1a	Mozambique	Angone	Bos taurus	Africa	Deposited in GenBank
JQ684039	T1a	Mozambique	Angone	Bos taurus	Africa	Deposited in GenBank
JQ684040	T1b1	Mozambique	Angone	Bos taurus	Africa	Deposited in GenBank
JQ684041	T1a	Mozambique	Angone	Bos taurus	Africa	Deposited in GenBank
JQ684042	T1b1	Mozambique	Angone	Bos taurus	Africa	Deposited in GenBank
JQ684043	T1a	Mozambique	Tete	Bos taurus	Africa	Deposited in GenBank
JQ684044	T1a	Mozambique	Tete	Bos taurus	Africa	Deposited in GenBank
JQ684045	T1b1	Mozambique	Tete	Bos taurus	Africa	Deposited in GenBank
U51842	T1b1	Nigeria	White Fulani	Bos indicus	Africa	Bradley et al., 1996
U51841	T1b1	Nigeria	White Fulani	Bos indicus	Africa	Bradley et al., 1996
U51840	T1b1	Nigeria	White Fulani	Bos indicus	Africa	Bradley et al., 1996
U51839	T1b1	Nigeria	N'Dama	Bos taurus	Africa	Bradley et al., 1996
U51838	T1b1b1a3a3a	Nigeria	N'Dama	Bos taurus	Africa	Bradley et al., 1996
U51837	T1b1	Nigeria	N'Dama	Bos taurus	Africa	Bradley et al., 1996
MT362777	T1a2a	Nigeria	Nigerian cattle/Kaduna	Bos taurus indicus	Africa	Current study
MT362778	T1a	Nigeria	Nigerian cattle/Kaduna	Bos taurus indicus	Africa	Current study
MT362779	T1a	Nigeria	Nigerian cattle/Kaduna	Bos taurus indicus	Africa	Current study
MT362780	T1a	Nigeria	Nigerian cattle/Kaduna	Bos taurus indicus	Africa	Current study
MT362781	T1a	Nigeria	Nigerian cattle/Kaduna	Bos taurus indicus	Africa	Current study
MT362782	T1a	Nigeria	Nigerian cattle/Kaduna	Bos taurus indicus	Africa	Current study
MT362783	T1a	Nigeria	Nigerian cattle/Kaduna	Bos taurus indicus	Africa	Current study
MT362784	T1a	Nigeria	Nigerian cattle/Kaduna	Bos taurus indicus	Africa	Current study
MT362785	T1g	Nigeria	Nigerian cattle/Kaduna	Bos taurus indicus	Africa	Current study
MT362786	T1g	Nigeria	Nigerian cattle/Kaduna	Bos taurus indicus	Africa	Current study
MT362787	T1b1	Nigeria	Nigerian cattle/Kaduna	Bos taurus indicus	Africa	Current study
MT362788	T1g	Nigeria	Nigerian cattle/Kaduna	Bos taurus indicus	Africa	Current study
MT362789	T1a	Nigeria	Nigerian cattle/Kaduna	Bos taurus indicus	Africa	Current study
MT362790	T1b1	Nigeria	Nigerian cattle/Kaduna	Bos taurus indicus	Africa	Current study
MT362791	T1a	Nigeria	Nigerian cattle/Kaduna	Bos taurus indicus	Africa	Current study
MT362792	T1g	Nigeria	Nigerian cattle/Kaduna	Bos taurus indicus	Africa	Current study
MT362793	T1a	Nigeria	Nigerian cattle/Kaduna	Bos taurus indicus	Africa	Current study
MT362794	T1a	Nigeria	Nigerian cattle/Kaduna	Bos taurus indicus	Africa	Current study
MT362795	T1a	Nigeria	Nigerian cattle/Kaduna	Bos taurus indicus	Africa	Current study
MT362796	T1a	Nigeria	Nigerian cattle/Kano	Bos taurus indicus	Africa	Current study
MT362797	T1a	Nigeria	Nigerian cattle/Kano	Bos taurus indicus	Africa	Current study
MT362798	T1a	Nigeria	Nigerian cattle/Kano	Bos taurus indicus	Africa	Current study
MT362799	T1b	Nigeria	Nigerian cattle/Kano	Bos taurus indicus	Africa	Current study
MT362800	T1a	Nigeria	Nigerian cattle/Katsina	Bos taurus indicus	Africa	Current study
MT362801	T1b1	Nigeria	Nigerian cattle/Katsina	Bos taurus indicus	Africa	Current study
MT362802	T1a	Nigeria	Nigerian cattle/Katsina	Bos taurus indicus	Africa	Current study
MT362803	T1g	Nigeria	Nigerian cattle/Katsina	Bos taurus indicus	Africa	Current study
MT362804	T1a	Nigeria	Nigerian cattle/Oyo	Bos taurus indicus	Africa	Current study
MT362805	T1a	Nigeria	Nigerian cattle/Plateau	Bos taurus indicus	Africa	Current study
MT362806	T1a	Nigeria	Nigerian cattle/Plateau	Bos taurus indicus	Africa	Current study
MT362807	T1d	Nigeria	Nigerian cattle/Plateau	Bos taurus indicus	Africa	Current study
MT362808	T1a	Nigeria	Nigerian cattle/Plateau	Bos taurus indicus	Africa	Current study
MT362809	T1b1	Nigeria	Nigerian cattle/Plateau	Bos taurus indicus	Africa	Current study
MT362810	T1b1	Nigeria	Nigerian cattle/Plateau	Bos taurus indicus	Africa	Current study
MT362811	T1g	Nigeria	Nigerian cattle/Plateau	Bos taurus indicus	Africa	Current study
MT362812	T1b1	Nigeria	Nigerian cattle/Plateau	Bos taurus indicus	Africa	Current study
MT362813	T1a	Nigeria	Nigerian cattle/Plateau	Bos taurus indicus	Africa	Current study
MT362814	T1a	Nigeria	Nigerian cattle/Plateau	Bos taurus indicus	Africa	Current study
MT362815	T1a	Nigeria	Nigerian cattle/Plateau	Bos taurus indicus	Africa	Current study
MT362816	T1a	Nigeria	Nigerian cattle/Plateau	Bos taurus indicus	Africa	Current study
MT362817	T1a	Nigeria	Nigerian cattle/Plateau	Bos taurus indicus	Africa	Current study
MT362818	T1a	Nigeria	Nigerian cattle/Plateau	Bos taurus indicus	Africa	Current study
MT362819	T1a	Nigeria	Nigerian cattle/Plateau	Bos taurus indicus	Africa	Current study
MT362820	T1a	Nigeria	Nigerian cattle/Plateau	Bos taurus indicus	Africa	Current study
MT362821	T1a	Nigeria	Nigerian cattle/Plateau	Bos taurus indicus	Africa	Current study
MT362822	T1a	Nigeria	Nigerian cattle/Plateau	Bos taurus indicus	Africa	Current study
MT362823	T1a	Nigeria	Nigerian cattle/Plateau	Bos taurus indicus	Africa	Current study
MT362824	T1a	Nigeria	Nigerian cattle/Plateau	Bos taurus indicus	Africa	Current study
MT362825	T1a	Nigeria	Nigerian cattle/Plateau	Bos taurus indicus	Africa	Current study
MT362826	T1a	Nigeria	Nigerian cattle/Sokoto	Bos taurus indicus	Africa	Current study
MT362827	T1a	Nigeria	Nigerian cattle/Sokoto	Bos taurus indicus	Africa	Current study
MT362828	T1b1	Nigeria	Nigerian cattle/Sokoto	Bos taurus indicus	Africa	Current study
MT362829	T1b1	Nigeria	Nigerian cattle/Sokoto	Bos taurus indicus	Africa	Current study
MT362830	T1a	Nigeria	Nigerian cattle/Sokoto	Bos taurus indicus	Africa	Current study
MT362831	T1b1	Nigeria	Nigerian cattle/Sokoto	Bos taurus indicus	Africa	Current study
MT362832	T1a	Nigeria	Nigerian cattle/Sokoto	Bos taurus indicus	Africa	Current study
MT362833	T1a	Nigeria	Nigerian cattle/Sokoto	Bos taurus indicus	Africa	Current study
MT362834	T1b1	Nigeria	Nigerian cattle/Sokoto	Bos taurus indicus	Africa	Current study
MT362835	T1b1	Nigeria	Nigerian cattle/Sokoto	Bos taurus indicus	Africa	Current study
MT362836	T1a	Nigeria	Nigerian cattle/Sokoto	Bos taurus indicus	Africa	Current study
MT362837	T1b1	Nigeria	Nigerian cattle/Sokoto	Bos taurus indicus	Africa	Current study
MT362838	T1a	Nigeria	Nigerian cattle/Sokoto	Bos taurus indicus	Africa	Current study
MT362839	T1b1	Nigeria	Nigerian cattle/Sokoto	Bos taurus indicus	Africa	Current study
MT362840	T1a	Nigeria	Nigerian cattle/Sokoto	Bos taurus indicus	Africa	Current study
MT362841	T1a	Nigeria	Nigerian cattle/Sokoto	Bos taurus indicus	Africa	Current study
MT362842	T1a	Nigeria	Nigerian cattle/Sokoto	Bos taurus indicus	Africa	Current study
MT362843	T1a	Nigeria	Nigerian cattle/Sokoto	Bos taurus indicus	Africa	Current study
MT362844	T1a	Nigeria	Nigerian cattle/Sokoto	Bos taurus indicus	Africa	Current study
MT362845	T1a	Nigeria	Nigerian cattle/Sokoto	Bos taurus indicus	Africa	Current study
MT362846	T1a	Nigeria	Nigerian cattle/Sokoto	Bos taurus indicus	Africa	Current study
MT362847	T1a	Nigeria	Nigerian cattle/Sokoto	Bos taurus indicus	Africa	Current study
MT362848	T1a	Nigeria	Nigerian cattle/Sokoto	Bos taurus indicus	Africa	Current study
MT362849	T1a	Nigeria	Nigerian cattle/Sokoto	Bos taurus indicus	Africa	Current study
MT362850	T1a	Nigeria	Nigerian cattle/Sokoto	Bos taurus indicus	Africa	Current study
MT362851	T1g	Nigeria	Nigerian cattle/Sokoto	Bos taurus indicus	Africa	Current study
MT362852	T1b1	Nigeria	Nigerian cattle/Sokoto	Bos taurus indicus	Africa	Current study
MT362853	T1g	Nigeria	Nigerian cattle/Taraba	Bos taurus indicus	Africa	Current study
MT362854	T1a	Nigeria	Nigerian cattle/Taraba	Bos taurus indicus	Africa	Current study
MT362855	T1b1	Nigeria	Nigerian cattle/Taraba	Bos taurus indicus	Africa	Current study
MT362856	T1b1	Nigeria	Nigerian cattle/Taraba	Bos taurus indicus	Africa	Current study
MT362857	T1b1	Nigeria	Nigerian cattle/Taraba	Bos taurus indicus	Africa	Current study
MT362858	T1a	Nigeria	Nigerian cattle/Taraba	Bos taurus indicus	Africa	Current study
MT362859	T1a	Nigeria	Nigerian cattle/Taraba	Bos taurus indicus	Africa	Current study
MT362860	T1a	Nigeria	Nigerian cattle/Taraba	Bos taurus indicus	Africa	Current study
MT362861	T1a	Nigeria	Nigerian cattle/Taraba	Bos taurus indicus	Africa	Current study
MT362862	T1a	Nigeria	Nigerian cattle/Taraba	Bos taurus indicus	Africa	Current study
MT362863	T1a	Nigeria	Nigerian cattle/Taraba	Bos taurus indicus	Africa	Current study
MT362864	T1a	Nigeria	Nigerian cattle/Taraba	Bos taurus indicus	Africa	Current study
MT362865	T1d	Nigeria	Nigerian cattle/Taraba	Bos taurus indicus	Africa	Current study
MT362866	T1a2a	Nigeria	Nigerian cattle/Taraba	Bos taurus indicus	Africa	Current study
MT362867	T1b1	Nigeria	Nigerian cattle/Taraba	Bos taurus indicus	Africa	Current study
MT362868	T1a	Nigeria	Nigerian cattle/Taraba	Bos taurus indicus	Africa	Current study
MT362869	T1c1	Nigeria	Nigerian cattle/Taraba	Bos taurus indicus	Africa	Current study
MT362870	T1g	Nigeria	Nigerian cattle/Taraba	Bos taurus indicus	Africa	Current study
MT362871	T1a	Nigeria	Nigerian cattle/Taraba	Bos taurus indicus	Africa	Current study
MT362872	T1a	Nigeria	Nigerian cattle/Taraba	Bos taurus indicus	Africa	Current study
MT362873	T1a2a	Nigeria	Nigerian cattle/Taraba	Bos taurus indicus	Africa	Current study
MT362874	T1a	Nigeria	Nigerian cattle/Taraba	Bos taurus indicus	Africa	Current study
MT362875	T1b1	Nigeria	Nigerian cattle/Taraba	Bos taurus indicus	Africa	Current study
MT362876	T1a	Nigeria	Nigerian cattle/Taraba	Bos taurus indicus	Africa	Current study
MT362877	T1b1	Nigeria	Nigerian cattle/Taraba	Bos taurus indicus	Africa	Current study
MT362878	T1a	Nigeria	Nigerian cattle/Taraba	Bos taurus indicus	Africa	Current study
MT362879	T1b1	Nigeria	Nigerian cattle/Taraba	Bos taurus indicus	Africa	Current study
MT362880	T1a	Nigeria	Nigerian cattle/Taraba	Bos taurus indicus	Africa	Current study
MT362881	T1a	Nigeria	Nigerian cattle/Taraba	Bos taurus indicus	Africa	Current study
MT362882	T1d	Nigeria	Nigerian cattle/Taraba	Bos taurus indicus	Africa	Current study
MT362883	T1a	Nigeria	Nigerian cattle/Taraba	Bos taurus indicus	Africa	Current study
MT362884	T1b1	Nigeria	Nigerian cattle/Taraba	Bos taurus indicus	Africa	Current study
MT362885	T1a	Nigeria	Nigerian cattle/Taraba	Bos taurus indicus	Africa	Current study
MT362886	T1b1	Nigeria	Nigerian cattle/Taraba	Bos taurus indicus	Africa	Current study
MT362887	T1g	Nigeria	Nigerian cattle/Taraba	Bos taurus indicus	Africa	Current study
MT362888	T1a	Nigeria	Nigerian cattle/Zamfara	Bos taurus indicus	Africa	Current study
MT362889	T1a	Nigeria	Nigerian cattle/Zamfara	Bos taurus indicus	Africa	Current study
MT362890	T1b1	Nigeria	Nigerian cattle/Zamfara	Bos taurus indicus	Africa	Current study
MT362891	T1a	Nigeria	Nigerian cattle/Zamfara	Bos taurus indicus	Africa	Current study
MT362892	T1b1	Nigeria	Nigerian cattle/Zamfara	Bos taurus indicus	Africa	Current study
MT362893	T1b1	Nigeria	Nigerian cattle/Zamfara	Bos taurus indicus	Africa	Current study
MT362894	T1g	Nigeria	Nigerian cattle/Zamfara	Bos taurus indicus	Africa	Current study
MT362895	T1g	Nigeria	Nigerian cattle/Zamfara	Bos taurus indicus	Africa	Current study
L27731	T1a	Nigeria	N'Dama	Bos taurus	Africa	Loftus et al., 1994
L27730	T1a	Nigeria	N'Dama	Bos taurus	Africa	Loftus et al., 1994
L27721	T1a	Nigeria	White Fulani	Bos taurus	Africa	Loftus et al., 1994
L27720	T1a	Nigeria	White Fulani	Bos taurus	Africa	Loftus et al., 1994
AF336737	T1b1	Nigeria	Fulani	Bos taurus	Africa	Troy et al., 2001
AF336736	T1b1	Nigeria	Fulani	Bos taurus	Africa	Troy et al., 2001
AF336735	T1b1	Nigeria	Fulani	Bos taurus	Africa	Troy et al., 2001
AF336734	T1b1	Nigeria	Fulani	Bos taurus	Africa	Troy et al., 2001
GU120045	T1b1b1a3	South Africa	Bonsmara	Bos taurus	Africa	Deposited in GenBank
GU120046	T1b1b1a3	South Africa	Bonsmara	Bos taurus	Africa	Deposited in GenBank
GU120047	T1b1b1a3	South Africa	Bonsmara	Bos taurus	Africa	Deposited in GenBank
GU120048	T1b1b1a3	South Africa	Bonsmara	Bos taurus	Africa	Deposited in GenBank
GU120049	T1b1b1a3	South Africa	Bonsmara	Bos taurus	Africa	Deposited in GenBank
GU120050	T1b1b1a3	South Africa	Bonsmara	Bos taurus	Africa	Deposited in GenBank
GU120051	T1b1b1a3	South Africa	Bonsmara	Bos taurus	Africa	Deposited in GenBank
GU120052	T1b1b1a3	South Africa	Bonsmara	Bos taurus	Africa	Deposited in GenBank
GU120053	T1b1	South Africa	Bonsmara	Bos taurus	Africa	Deposited in GenBank
GU120054	T1b1	South Africa	Bonsmara	Bos taurus	Africa	Deposited in GenBank
GU120055	T1b1	South Africa	Bonsmara	Bos taurus	Africa	Deposited in GenBank
GU120056	T1b1	South Africa	Bonsmara	Bos taurus	Africa	Deposited in GenBank
GU120057	T1b1	South Africa	Bonsmara	Bos taurus	Africa	Deposited in GenBank
GU120058	T1b1	South Africa	Bonsmara	Bos taurus	Africa	Deposited in GenBank
GU120059	T1b1	South Africa	Bonsmara	Bos taurus	Africa	Deposited in GenBank
GU120060	T1b1	South Africa	Bonsmara	Bos taurus	Africa	Deposited in GenBank
KF163094	T1b1b1a	South Africa	Nguni	Bos taurus	Africa	Horsburgh et al., 2013
KF163091	T1b1b1a3	South Africa	Nguni	Bos taurus	Africa	Horsburgh et al., 2013
KF163090	T1b1b1a3	South Africa	Nguni	Bos taurus	Africa	Horsburgh et al., 2013
KF163089	T1b1b1a3	South Africa	Nguni	Bos taurus	Africa	Horsburgh et al., 2013
KF163088	T1b1b1a2a	South Africa	Nguni	Bos taurus	Africa	Horsburgh et al., 2013
KF163086	T1b1b1a	South Africa	Nguni	Bos taurus	Africa	Horsburgh et al., 2013
KF163085	T1b1b1a3a	South Africa	Nguni	Bos taurus	Africa	Horsburgh et al., 2013
KF163083	T1b1b1a3a	South Africa	Nguni	Bos taurus	Africa	Horsburgh et al., 2013
KF163080	T1b1b1a	South Africa	Nguni	Bos taurus	Africa	Horsburgh et al., 2013
KF163079	T1b1b1a	South Africa	Nguni	Bos taurus	Africa	Horsburgh et al., 2013
KF163078	T1b1b1a3a3a	South Africa	Nguni	Bos taurus	Africa	Horsburgh et al., 2013
KF163077	T1b1b1a3a3a	South Africa	Nguni	Bos taurus	Africa	Horsburgh et al., 2013
KF163075	T1b1b1a3	South Africa	Nguni	Bos taurus	Africa	Horsburgh et al., 2013
KF163074	T1b1b1a2	South Africa	Nguni	Bos taurus	Africa	Horsburgh et al., 2013
KF163073	T1b1	South Africa	Nguni	Bos taurus	Africa	Horsburgh et al., 2013
KF163072	T1c	South Africa	Nguni	Bos taurus	Africa	Horsburgh et al., 2013
KF163071	T1b1b1a3a3a	South Africa	Nguni	Bos taurus	Africa	Horsburgh et al., 2013
KF163070	T1b1b1a3	South Africa	Nguni	Bos taurus	Africa	Horsburgh et al., 2013
KF163069	T1b1b1a3	South Africa	Nguni	Bos taurus	Africa	Horsburgh et al., 2013
KF163068	T1b1b1a3	South Africa	Nguni	Bos taurus	Africa	Horsburgh et al., 2013
KF163067	T1b1b1a3	South Africa	Nguni	Bos taurus	Africa	Horsburgh et al., 2013
KF163066	T1b1b1a3	South Africa	Nguni	Bos taurus	Africa	Horsburgh et al., 2013
KF163065	T1b1b1a3a2	South Africa	Nguni	Bos taurus	Africa	Horsburgh et al., 2013
KF163064	T1b1b1a3	South Africa	Nguni	Bos taurus	Africa	Horsburgh et al., 2013
KF163062	T1b1b1a3	South Africa	Nguni	Bos taurus	Africa	Horsburgh et al., 2013
KF163093	T1b1b1a3	South Africa	Nguni	Bos taurus	Africa	Horsburgh et al., 2013
KF163092	T1g	South Africa	Nguni	Bos taurus	Africa	Horsburgh et al., 2013
KF163087	T1b1	South Africa	Nguni	Bos taurus	Africa	Horsburgh et al., 2013
KF163084	T1b1	South Africa	Nguni	Bos taurus	Africa	Horsburgh et al., 2013
KF163082	T1b1	South Africa	Nguni	Bos taurus	Africa	Horsburgh et al., 2013
KF163081	T1g	South Africa	Nguni	Bos taurus	Africa	Horsburgh et al., 2013
KF163076	T1b1	South Africa	Nguni	Bos taurus	Africa	Horsburgh et al., 2013
KF163063	T1b1	South Africa	Nguni	Bos taurus	Africa	Horsburgh et al., 2013
KF163061	T1b1	South Africa	Nguni	Bos taurus	Africa	Horsburgh et al., 2013
DQ515756	T1g	Sudan	Sudan Baggara	Bos taurus	Africa	Beja-Pereira et al., 2006
DQ515755	T1b1	Sudan	Sudan Baggara	Bos taurus	Africa	Beja-Pereira et al., 2006
DQ515754	T1b1	Sudan	Sudan Baggara	Bos taurus	Africa	Beja-Pereira et al., 2006
DQ515753	T1b1	Sudan	Sudan Baggara	Bos taurus	Africa	Beja-Pereira et al., 2006
DQ515752	T1b1	Sudan	Sudan Baggara	Bos taurus	Africa	Beja-Pereira et al., 2006
DQ515751	T1b1	Sudan	Sudan Baggara	Bos taurus	Africa	Beja-Pereira et al., 2006
DQ515750	T1g	Sudan	Sudan Baggara	Bos taurus	Africa	Beja-Pereira et al., 2006
DQ515749	T1g	Sudan	Sudan Baggara	Bos taurus	Africa	Beja-Pereira et al., 2006
DQ515748	T1b1	Sudan	Sudan Baggara	Bos taurus	Africa	Beja-Pereira et al., 2006
DQ515747	T1b1	Sudan	Sudan Baggara	Bos taurus	Africa	Beja-Pereira et al., 2006
DQ515746	T1g	Sudan	Sudan Baggara	Bos taurus	Africa	Beja-Pereira et al., 2006
DQ515745	T1b1	Sudan	Sudan Baggara	Bos taurus	Africa	Beja-Pereira et al., 2006
U51836	T1b1	Sudan	Kenana	Bos indicus	Africa	Bradley et al., 1996
U51835	T1b1	Sudan	Kenana	Bos indicus	Africa	Bradley et al., 1996
U51834	T1a2a	Sudan	Butana	Bos indicus	Africa	Bradley et al., 1996
U51833	T1b1	Sudan	Butana	Bos indicus	Africa	Bradley et al., 1996
U51832	T1b1	Sudan	Butana	Bos indicus	Africa	Bradley et al., 1996
U51831	T1b1	Sudan	Butana	Bos indicus	Africa	Bradley et al., 1996
U51830	T1b1	Sudan	Butana	Bos indicus	Africa	Bradley et al., 1996
L27729	T1a	Sudan	Kenana	Bos indicus	Africa	Loftus et al., 1994
L27715	T1b1c	Sudan	Butana	Bos indicus	Africa	Loftus et al., 1994
L27714	T1b1c	Sudan	Butana	Bos indicus	Africa	Loftus et al., 1994
L27728	T1b1	Sudan	Kenana	Bos taurus	Africa	Loftus et al., 1994
AF336733	T1b1	Sudan	Kenana	Bos taurus	Africa	Troy et al., 2001
AF336732	T1b1	Sudan	Kenana	Bos taurus	Africa	Troy et al., 2001
AF336731	T1b1	Sudan	Kenana	Bos taurus	Africa	Troy et al., 2001
AF336730	T1b1	Sudan	Kenana	Bos taurus	Africa	Troy et al., 2001
AF336729	T1b1	Sudan	Kenana	Bos taurus	Africa	Troy et al., 2001
AF336717	T1b1	Sudan	Butana	Bos taurus	Africa	Troy et al., 2001
AF336716	T1b1	Sudan	Butana	Bos taurus	Africa	Troy et al., 2001
AF336715	T1b1	Sudan	Butana	Bos taurus	Africa	Troy et al., 2001
AF336714	T1b1	Sudan	Butana	Bos taurus	Africa	Troy et al., 2001
AF336713	T1b1	Sudan	Butana	Bos taurus	Africa	Troy et al., 2001
AF336712	T1b1	Sudan	Butana	Bos taurus	Africa	Troy et al., 2001
AF336711	T1b1	Sudan	Butana	Bos taurus	Africa	Troy et al., 2001
DQ515619	T1b1	Tunisia	Tunisia Blonde	Bos taurus	Africa	Beja-Pereira et al., 2006
DQ515618	T1g	Tunisia	Tunisia Blonde	Bos taurus	Africa	Beja-Pereira et al., 2006
DQ515617	T1g	Tunisia	Tunisia Blonde	Bos taurus	Africa	Beja-Pereira et al., 2006
DQ515616	T1	Tunisia	Tunisia Blonde	Bos taurus	Africa	Beja-Pereira et al., 2006
DQ515615	T1b1	Tunisia	Tunisia Blonde	Bos taurus	Africa	Beja-Pereira et al., 2006
DQ515614	T1b1	Tunisia	Tunisia Blonde	Bos taurus	Africa	Beja-Pereira et al., 2006
DQ515613	T1b1	Tunisia	Tunisia Blonde	Bos taurus	Africa	Beja-Pereira et al., 2006
DQ515612	T1c1a1	Tunisia	Tunisia Blonde	Bos taurus	Africa	Beja-Pereira et al., 2006
DQ515611	T1c1a1	Tunisia	Tunisia Blonde	Bos taurus	Africa	Beja-Pereira et al., 2006
DQ515610	T1c1	Tunisia	Tunisia Blonde	Bos taurus	Africa	Beja-Pereira et al., 2006
DQ515609	T1	Tunisia	Tunisia Blonde	Bos taurus	Africa	Beja-Pereira et al., 2006
DQ515608	T1b1	Tunisia	Tunisia Blonde	Bos taurus	Africa	Beja-Pereira et al., 2006
DQ515607	T1b1	Tunisia	Blonde	Bos taurus	Africa	Beja-Pereira et al., 2006
DQ515608	T1b1	Tunisia	Blonde	Bos taurus	Africa	Beja-Pereira et al., 2006
DQ515609	T1	Tunisia	Blonde	Bos taurus	Africa	Beja-Pereira et al., 2006
DQ515610	T1c1	Tunisia	Blonde	Bos taurus	Africa	Beja-Pereira et al., 2006
DQ515611	T1c1a1	Tunisia	Blonde	Bos taurus	Africa	Beja-Pereira et al., 2006
DQ515612	T1c1a1	Tunisia	Blonde	Bos taurus	Africa	Beja-Pereira et al., 2006
DQ515613	T1b1	Tunisia	Blonde	Bos taurus	Africa	Beja-Pereira et al., 2006
DQ515614	T1b1	Tunisia	Blonde	Bos taurus	Africa	Beja-Pereira et al., 2006
DQ515615	T1b1	Tunisia	Blonde	Bos taurus	Africa	Beja-Pereira et al., 2006
DQ515616	T1	Tunisia	Blonde	Bos taurus	Africa	Beja-Pereira et al., 2006
DQ515617	T1g	Tunisia	Blonde	Bos taurus	Africa	Beja-Pereira et al., 2006
DQ515618	T1g	Tunisia	Blonde	Bos taurus	Africa	Beja-Pereira et al., 2006
DQ515619	T1b1	Tunisia	Blonde	Bos taurus	Africa	Beja-Pereira et al., 2006
