# Supplementary material for: Genetic variation of Nigerian cattle inferred from maternal and paternal genetic markers
Source: PeerJ. 2021 Mar 5;9:e10607. doi: 10.7717/peerj.10607 (PMC7938780; doi:10.7717/peerj.10607)
Supplement: Supplemental Information 6 [file peerj-09-10607-s006.xlsx]

## Sheet: Sheet1
Table S2. The information of all cattle samples used in this study based on 286 bp of the intron 10 region of ZFY gene
GenBank Accession No.	Sample ID	Haplogroup	Country	Breed/Population	Classification	Continental Origin	Reference
MW284951	Nigeria4_Y3	Y3b	Nigeria	Nigerian cattle/Kaduna	Bos taurus indicus	Africa	Current study
MW284952	Nigeria28_Y3	Y3b	Nigeria	Nigerian cattle/Kaduna	Bos taurus indicus	Africa	Current study
MW284953	Nigeria18_Y3	Y3b	Nigeria	Nigerian cattle/Kaduna	Bos taurus indicus	Africa	Current study
MW284954	Nigeria6_Y3	Y3b	Nigeria	Nigerian cattle/Kano	Bos taurus indicus	Africa	Current study
MW284955	Nigeria42_Y3	Y3a	Nigeria	Nigerian cattle/Kano	Bos taurus indicus	Africa	Current study
MW284956	Nigeria41_Y3	Y3b	Nigeria	Nigerian cattle/Katsina	Bos taurus indicus	Africa	Current study
MW284957	Nigeria36_Y3	Y3b	Nigeria	Nigerian cattle/Katsina	Bos taurus indicus	Africa	Current study
MW284958	Nigeria27_Y3	Y3b	Nigeria	Nigerian cattle/Oyo	Bos taurus indicus	Africa	Current study
MW284959	Nigeria38_Y3	Y3b	Nigeria	Nigerian cattle/Oyo	Bos taurus indicus	Africa	Current study
MW284960	Nigeria43_Y3	Y3b	Nigeria	Nigerian cattle/Plateau	Bos taurus indicus	Africa	Current study
MW284961	Nigeria10_Y3	Y3b	Nigeria	Nigerian cattle/Plateau	Bos taurus indicus	Africa	Current study
MW284962	Nigeria37_Y3	Y3b	Nigeria	Nigerian cattle/Sokoto	Bos taurus indicus	Africa	Current study
MW284963	Nigeria34_Y3	Y3b	Nigeria	Nigerian cattle/Sokoto	Bos taurus indicus	Africa	Current study
MW284964	Nigeria32_Y3	Y3b	Nigeria	Nigerian cattle/Sokoto	Bos taurus indicus	Africa	Current study
MW284965	Nigeria25_Y3	Y3b	Nigeria	Nigerian cattle/Sokoto	Bos taurus indicus	Africa	Current study
MW284966	Nigeria22_Y3	Y3b	Nigeria	Nigerian cattle/Taraba	Bos taurus indicus	Africa	Current study
MW284967	Nigeria20_Y3	Y3b	Nigeria	Nigerian cattle/Taraba	Bos taurus indicus	Africa	Current study
MW284968	Nigeria7_Y3	Y3b	Nigeria	Nigerian cattle/Taraba	Bos taurus indicus	Africa	Current study
MW284969	Nigeria12_Y3	Y3b	Nigeria	Nigerian cattle/Zamfara	Bos taurus indicus	Africa	Current study
MW284970	Nigeria8_Y3	Y3b	Nigeria	Nigerian cattle/Zamfara	Bos taurus indicus	Africa	Current study
DQ336537		Y3			Bos indicus	Asia	Nijman et al. 2008
EU547270		Y3	Texas, USA	Brahman	Bos indicus	Indian/Asian zebu-sampled in America	Ginja et al. 2009
EU547271		Y3	Texas, USA	Brahman	Bos indicus	Indian/Asian zebu-sampled in America	Ginja et al. 2009
DQ336536		Y2			Bos taurus	Europe	Nijman et al. 2008
EU547272		Y2	Portugal	Mertolenga	Bos taurus	Europe	Ginja, Telo da Gama & Penedo 2009
EU547273		Y2	Portugal	Mirandesa	Bos taurus	Europe	Ginja, Telo da Gama & Penedo 2009
MF683853		Y1	China	Qaidam	Bos taurus	European taurine-sampled in China	Deposited in Genbank
MF683854		Y2	China	Qaidam	Bos taurus	European taurine-sampled in China	Deposited in Genbank
