# Supplementary material for: Genetic variation of Nigerian cattle inferred from maternal and paternal genetic markers
Source: PeerJ. 2021 Mar 5;9:e10607. doi: 10.7717/peerj.10607 (PMC7938780; doi:10.7717/peerj.10607)
Supplement: Supplemental Information 7 [file peerj-09-10607-s007.xlsx]

## Sheet: Sheet1
Table S3. Primer sequence information for the amplification of mtDNA and Y-chromosome markers
Gene	Accession no./Reference	Fragment length	Annealing temp	Primer sequence (5'-3')
D-loop	L27712; Loftus et a.,l 1994	636 bp	58 °C	F-TAAACTATTCCCTGAACACTATT
				R-TGCTTATCATTATGCTGGTG
ZFY_10	Ginja et a.l. 2009	286 bp	53 °C	F-CCAAAATGGTTGAGCTTTATGA
				R-GGAGCATAAGTGATCCAATGAA
