# Supplementary material for: Genetic variation of Nigerian cattle inferred from maternal and paternal genetic markers
Source: PeerJ. 2021 Mar 5;9:e10607. doi: 10.7717/peerj.10607 (PMC7938780; doi:10.7717/peerj.10607)
Supplement: Supplemental Information 8 [file peerj-09-10607-s008.xlsx]

## Sheet: Sheet1
Table S4. The distribution of haplogroups sharing in Africa, Europe and West Asia based on 636 bp of the mtDNA D-loop region
			Country
Haplogroup	Haplotype	Haplotype Frequency	Nigeria	Egypt	Ethiopia	Mozambique	South Africa	Europe	West Asia
T1	Hap_1	1	0	1	0	0	0	0	0
T3	Hap_2	1	0	0	0	0	0	0	1
T3	Hap_3	1	0	0	0	0	0	0	1
T3	Hap_4	1	0	0	0	0	0	0	1
T3	Hap_5	1	0	0	0	0	0	0	1
T3	Hap_6	14	0	0	0	0	0	13	1
T1	Hap_7	1	0	0	0	0	0	0	1
T2	Hap_8	1	0	0	0	0	0	0	1
I2	Hap_9	1	0	0	0	0	0	0	1
I2	Hap_10	1	0	0	0	0	0	0	1
I1	Hap_11	2	0	0	0	0	0	1	1
T5	Hap_12	1	0	0	0	0	0	0	1
T5	Hap_13	1	0	0	0	0	0	0	1
T2	Hap_14	3	0	1	0	0	0	1	1
T2	Hap_15	1	0	0	0	0	0	0	1
T2	Hap_16	1	0	0	0	0	0	0	1
T2	Hap_17	1	0	0	0	0	0	0	1
T1	Hap_18	1	0	0	1	0	0	0	0
T1	Hap_19	4	2	0	2	0	0	0	0
T1	Hap_20	2	0	0	2	0	0	0	0
T1	Hap_21	26	11	2	11	0	0	2	0
T1	Hap_22	1	0	0	1	0	0	0	0
T1	Hap_23	2	0	0	2	0	0	0	0
T1	Hap_24	5	2	0	2	0	0	1	0
T1	Hap_25	1	0	0	1	0	0	0	0
T1	Hap_26	1	0	0	1	0	0	0	0
T1	Hap_27	28	6	1	18	1	1	1	0
T1	Hap_28	1	0	0	1	0	0	0	0
T1	Hap_29	1	0	0	1	0	0	0	0
T1	Hap_30	1	0	0	1	0	0	0	0
T1	Hap_31	1	0	0	1	0	0	0	0
T1	Hap_32	4	0	0	3	1	0	0	0
T1	Hap_33	2	0	0	2	0	0	0	0
T1	Hap_34	1	0	0	1	0	0	0	0
T1	Hap_35	4	3	0	1	0	0	0	0
T1	Hap_36	1	0	0	1	0	0	0	0
T1	Hap_37	1	0	0	1	0	0	0	0
T1	Hap_38	1	0	0	1	0	0	0	0
T1	Hap_39	8	1	0	7	0	0	0	0
T1	Hap_40	1	0	0	1	0	0	0	0
T1	Hap_41	1	0	0	1	0	0	0	0
T1	Hap_42	1	0	0	1	0	0	0	0
T1	Hap_43	1	0	0	1	0	0	0	0
T1	Hap_44	1	0	0	1	0	0	0	0
T1	Hap_45	2	0	0	2	0	0	0	0
T1	Hap_46	1	0	0	1	0	0	0	0
T1	Hap_47	1	0	0	1	0	0	0	0
T1	Hap_48	1	0	0	1	0	0	0	0
T1	Hap_49	1	0	0	1	0	0	0	0
T1	Hap_50	1	0	0	1	0	0	0	0
T1	Hap_51	1	0	0	1	0	0	0	0
T1	Hap_52	1	0	0	1	0	0	0	0
T1	Hap_53	1	0	0	1	0	0	0	0
T1	Hap_54	1	0	0	1	0	0	0	0
T1	Hap_55	3	1	0	2	0	0	0	0
T1	Hap_56	1	0	0	1	0	0	0	0
T1	Hap_57	1	0	0	1	0	0	0	0
T1	Hap_58	1	0	0	1	0	0	0	0
T1	Hap_59	4	2	0	1	0	1	0	0
T1	Hap_60	1	0	0	1	0	0	0	0
T1	Hap_61	1	0	0	1	0	0	0	0
T1	Hap_62	1	0	0	1	0	0	0	0
T1	Hap_63	1	0	0	1	0	0	0	0
T1	Hap_64	1	0	0	1	0	0	0	0
T1	Hap_65	2	1	0	1	0	0	0	0
T1	Hap_66	1	0	0	1	0	0	0	0
T1	Hap_67	1	0	0	1	0	0	0	0
T1	Hap_68	1	0	0	1	0	0	0	0
T1	Hap_69	1	0	0	1	0	0	0	0
T1	Hap_70	2	0	0	2	0	0	0	0
T1	Hap_71	1	0	0	1	0	0	0	0
T1	Hap_72	1	0	0	1	0	0	0	0
T1	Hap_73	1	0	0	1	0	0	0	0
T1	Hap_74	1	0	0	1	0	0	0	0
T1	Hap_75	1	0	0	1	0	0	0	0
T1	Hap_76	1	0	0	1	0	0	0	0
T1	Hap_77	1	0	0	1	0	0	0	0
T1	Hap_78	1	0	0	1	0	0	0	0
T1	Hap_79	1	0	0	1	0	0	0	0
T1	Hap_80	1	0	0	1	0	0	0	0
T1	Hap_81	2	0	0	1	1	0	0	0
T1	Hap_82	1	0	0	1	0	0	0	0
T1	Hap_83	1	0	0	1	0	0	0	0
T1	Hap_84	1	0	0	1	0	0	0	0
T1	Hap_85	1	0	0	1	0	0	0	0
T1	Hap_86	1	0	0	1	0	0	0	0
T1	Hap_87	1	0	0	1	0	0	0	0
T1	Hap_88	1	0	0	1	0	0	0	0
T1	Hap_89	1	0	0	1	0	0	0	0
T1	Hap_90	1	0	0	1	0	0	0	0
T1	Hap_91	1	0	0	1	0	0	0	0
T1	Hap_92	1	0	0	1	0	0	0	0
T1	Hap_93	1	0	0	1	0	0	0	0
T1	Hap_94	1	0	0	1	0	0	0	0
T1	Hap_95	1	0	0	1	0	0	0	0
T1	Hap_96	1	0	0	1	0	0	0	0
T1	Hap_97	1	0	0	1	0	0	0	0
T1	Hap_98	3	0	0	1	1	1	0	0
T1	Hap_99	1	0	0	1	0	0	0	0
T1	Hap_100	1	0	0	1	0	0	0	0
T3	Hap_101	1	0	0	0	0	0	1	0
T3	Hap_102	1	0	0	0	0	0	1	0
T3	Hap_103	1	0	0	0	0	0	1	0
T3	Hap_104	1	0	0	0	0	0	1	0
T3	Hap_105	1	0	0	0	0	0	1	0
T1	Hap_106	2	0	1	0	0	0	1	0
T1	Hap_107	1	0	0	0	0	0	1	0
T1	Hap_108	2	0	0	0	0	0	2	0
Q	Hap_109	2	0	0	0	0	0	2	0
T5	Hap_110	4	0	0	0	0	0	4	0
T2	Hap_111	1	0	0	0	0	0	1	0
T2	Hap_112	1	0	0	0	0	0	1	0
T2	Hap_113	1	0	0	0	0	0	1	0
T2	Hap_114	1	0	0	0	0	0	1	0
T2	Hap_115	1	0	0	0	0	0	1	0
T2	Hap_116	1	0	0	0	0	0	1	0
T2	Hap_117	1	0	0	0	0	0	1	0
T1	Hap_118	1	0	0	0	0	0	1	0
T1	Hap_119	1	0	0	0	0	0	1	0
T1	Hap_120	1	0	0	0	0	0	1	0
T1	Hap_121	1	0	0	0	0	0	1	0
T3	Hap_122	2	0	0	0	0	0	2	0
T3	Hap_123	1	0	0	0	0	0	1	0
T3	Hap_124	1	0	0	0	0	0	1	0
T3	Hap_125	1	0	0	0	0	0	1	0
T3	Hap_126	1	0	0	0	0	0	1	0
T3	Hap_127	1	0	0	0	0	0	1	0
T3	Hap_128	1	0	0	0	0	0	1	0
T3	Hap_129	1	0	0	0	0	0	1	0
T3	Hap_130	1	0	0	0	0	0	1	0
T3	Hap_131	1	0	0	0	0	0	1	0
T3	Hap_132	1	0	0	0	0	0	1	0
T3	Hap_133	1	0	0	0	0	0	1	0
T3	Hap_134	1	0	0	0	0	0	1	0
T3	Hap_135	1	0	0	0	0	0	1	0
T3	Hap_136	2	0	0	0	0	0	2	0
T3	Hap_137	1	0	0	0	0	0	1	0
T4	Hap_138	1	0	0	0	0	0	1	0
T	Hap_139	1	0	0	0	0	0	1	0
T3	Hap_140	1	0	0	0	0	0	1	0
T3	Hap_141	2	0	0	0	0	0	2	0
T3	Hap_142	1	0	0	0	0	0	1	0
T3	Hap_143	1	0	0	0	0	0	1	0
T3	Hap_144	1	0	0	0	0	0	1	0
T3	Hap_145	1	0	0	0	0	0	1	0
T3	Hap_146	1	0	0	0	0	0	1	0
T3	Hap_147	1	0	0	0	0	0	1	0
T3	Hap_148	1	0	0	0	0	0	1	0
T3	Hap_149	1	0	0	0	0	0	1	0
T1	Hap_150	1	0	0	0	1	0	0	0
T1	Hap_151	5	0	0	0	1	4	0	0
T1	Hap_152	1	0	0	0	1	0	0	0
T1	Hap_153	1	0	0	0	1	0	0	0
T1	Hap_154	1	0	0	0	1	0	0	0
T1	Hap_155	1	0	0	0	1	0	0	0
T1	Hap_156	3	0	0	0	2	1	0	0
T1	Hap_157	1	0	0	0	1	0	0	0
T1	Hap_158	1	0	0	0	1	0	0	0
T1	Hap_159	3	2	0	0	1	0	0	0
T1	Hap_160	1	0	0	0	1	0	0	0
T1	Hap_161	1	1	0	0	0	0	0	0
T1	Hap_162	1	1	0	0	0	0	0	0
T1	Hap_163	1	1	0	0	0	0	0	0
T1	Hap_164	3	3	0	0	0	0	0	0
T1	Hap_165	1	1	0	0	0	0	0	0
T1	Hap_166	1	1	0	0	0	0	0	0
T1	Hap_167	1	1	0	0	0	0	0	0
T1	Hap_168	1	1	0	0	0	0	0	0
T1	Hap_169	1	1	0	0	0	0	0	0
T1	Hap_170	2	2	0	0	0	0	0	0
T1	Hap_171	1	1	0	0	0	0	0	0
T1	Hap_172	1	1	0	0	0	0	0	0
T1	Hap_173	2	2	0	0	0	0	0	0
T1	Hap_174	3	3	0	0	0	0	0	0
T1	Hap_175	1	1	0	0	0	0	0	0
T1	Hap_176	1	1	0	0	0	0	0	0
T1	Hap_177	1	1	0	0	0	0	0	0
T1	Hap_178	2	2	0	0	0	0	0	0
T1	Hap_179	1	1	0	0	0	0	0	0
T1	Hap_180	3	3	0	0	0	0	0	0
T1	Hap_181	1	1	0	0	0	0	0	0
T1	Hap_182	1	1	0	0	0	0	0	0
T1	Hap_183	4	4	0	0	0	0	0	0
T1	Hap_184	1	1	0	0	0	0	0	0
T1	Hap_185	1	1	0	0	0	0	0	0
T1	Hap_186	1	1	0	0	0	0	0	0
T1	Hap_187	1	1	0	0	0	0	0	0
T1	Hap_188	2	2	0	0	0	0	0	0
T1	Hap_189	1	1	0	0	0	0	0	0
T1	Hap_190	3	3	0	0	0	0	0	0
T1	Hap_191	1	1	0	0	0	0	0	0
T1	Hap_192	1	1	0	0	0	0	0	0
T1	Hap_193	1	1	0	0	0	0	0	0
T1	Hap_194	1	1	0	0	0	0	0	0
T1	Hap_195	1	1	0	0	0	0	0	0
T1	Hap_196	2	2	0	0	0	0	0	0
T1	Hap_197	3	3	0	0	0	0	0	0
T3	Hap_198	1	1	0	0	0	0	0	0
T1	Hap_199	1	1	0	0	0	0	0	0
T1	Hap_200	1	1	0	0	0	0	0	0
T1	Hap_201	1	1	0	0	0	0	0	0
T1	Hap_202	1	1	0	0	0	0	0	0
T1	Hap_203	1	1	0	0	0	0	0	0
T1	Hap_204	1	1	0	0	0	0	0	0
T1	Hap_205	1	1	0	0	0	0	0	0
T1	Hap_206	1	1	0	0	0	0	0	0
T1	Hap_207	1	1	0	0	0	0	0	0
T1	Hap_208	1	1	0	0	0	0	0	0
T1	Hap_209	1	1	0	0	0	0	0	0
T1	Hap_210	1	1	0	0	0	0	0	0
T1	Hap_211	1	1	0	0	0	0	0	0
T1	Hap_212	1	1	0	0	0	0	0	0
T1	Hap_213	1	1	0	0	0	0	0	0
T1	Hap_214	1	1	0	0	0	0	0	0
T1	Hap_215	1	1	0	0	0	0	0	0
T1	Hap_216	1	1	0	0	0	0	0	0
T1	Hap_217	1	1	0	0	0	0	0	0
T1	Hap_218	1	1	0	0	0	0	0	0
T1	Hap_219	2	2	0	0	0	0	0	0
T1	Hap_220	1	1	0	0	0	0	0	0
T1	Hap_221	1	1	0	0	0	0	0	0
T1	Hap_222	1	1	0	0	0	0	0	0
T1	Hap_223	1	1	0	0	0	0	0	0
T1	Hap_224	1	1	0	0	0	0	0	0
T1	Hap_225	1	1	0	0	0	0	0	0
T1	Hap_226	1	1	0	0	0	0	0	0
T1	Hap_227	1	1	0	0	0	0	0	0
T1	Hap_228	1	1	0	0	0	0	0	0
T3	Hap_229	1	1	0	0	0	0	0	0
T1	Hap_230	1	1	0	0	0	0	0	0
T1	Hap_231	1	1	0	0	0	0	0	0
T1	Hap_232	1	0	0	0	0	1	0	0
T1	Hap_233	4	0	0	0	0	4	0	0
T1	Hap_234	5	0	0	0	0	5	0	0
T1	Hap_235	1	0	0	0	0	1	0	0
T1	Hap_236	1	0	0	0	0	1	0	0
T1	Hap_237	1	0	0	0	0	1	0	0
T1	Hap_238	1	0	0	0	0	1	0	0
T1	Hap_239	1	0	0	0	0	1	0	0
T1	Hap_240	1	0	0	0	0	1	0	0
T1	Hap_241	1	0	0	0	0	1	0	0
T1	Hap_242	1	0	0	0	0	1	0	0
T1	Hap_243	1	0	0	0	0	1	0	0
T1	Hap_244	1	0	0	0	0	1	0	0
T1	Hap_245	1	0	0	0	0	1	0	0
T1	Hap_246	1	0	0	0	0	1	0	0
T1	Hap_247	1	0	0	0	0	1	0	0
T1	Hap_248	1	0	0	0	0	1	0	0
T1	Hap_249	1	0	0	0	0	1	0	0
T1	Hap_250	1	0	0	0	0	1	0	0
T1	Hap_251	1	0	1	0	0	0	0	0
T1	Hap_252	1	0	1	0	0	0	0	0
T1	Hap_253	1	0	1	0	0	0	0	0
T1	Hap_254	1	0	1	0	0	0	0	0
T1	Hap_255	1	0	1	0	0	0	0	0
T1	Hap_256	1	0	1	0	0	0	0	0
T1	Hap_257	1	0	1	0	0	0	0	0
T1	Hap_258	1	0	1	0	0	0	0	0
Q1	Hap_259	1	0	1	0	0	0	0	0
Q1	Hap_260	1	0	1	0	0	0	0	0
T1	Hap_261	1	0	1	0	0	0	0	0
T1	Hap_262	1	0	1	0	0	0	0	0
T1	Hap_263	1	0	1	0	0	0	0	0
T1	Hap_264	1	0	1	0	0	0	0	0
T1	Hap_265	1	0	1	0	0	0	0	0
T2	Hap_266	1	0	1	0	0	0	0	0
T2	Hap_267	1	0	1	0	0	0	0	0
T2	Hap_268	1	0	1	0	0	0	0	0
T2	Hap_269	1	0	1	0	0	0	0	0
T2	Hap_270	1	0	1	0	0	0	0	0
T3	Hap_271	1	0	1	0	0	0	0	0
T3	Hap_272	1	0	1	0	0	0	0	0
T3	Hap_273	1	0	1	0	0	0	0	0
T3	Hap_274	1	0	1	0	0	0	0	0
T3	Hap_275	1	0	1	0	0	0	0	0
Total		420	121	31	126	16	34	76	16
