# Supplementary material for: Genetic variation of Nigerian cattle inferred from maternal and paternal genetic markers
Source: PeerJ. 2021 Mar 5;9:e10607. doi: 10.7717/peerj.10607 (PMC7938780; doi:10.7717/peerj.10607)
Supplement: Supplemental Information 14 [file peerj-09-10607-s014.xlsx]

## Sheet: Sheet1
Supplementary Data S1. DNA sequence information of the 20 male Nigerian cattle samples
>Nigeria4_Y3
CCAAAATGGTTGAGCTTTATGAATGTTTTCCCCAGATATCTAAGCAAATACGGCTTTCAGTTTTTGCTGCTTCATATATTTTAATTGGGTTTTTATTATCTTTTAATTATATTTTAATTGGTACAGTCATTATGAGTTTTCTGGACCAAATTCACTTTATTACTATGGTAACTGTTTTTTGTTGAAAAGTGTAATATATAAGAAAGAGTACTTGTAAATGTGTTCAGAACTCACTTTATATGCTTGAAGAGATGACAACTGAACTTCATTGGATCACTTCAGCTCC
>Nigeria28_Y3
CCAAAATGGTTGAGCTTTATGAATGTTTTCCCCAGATATCTAAGCAAATACGGCTTTCAGTTTTTGCTGCTTCATATATTTTAATTGGGTTTTTATTATCTTTTAATTATATTTTAATTGGTACAGTCATTATGAGTTTTCTGGACCAAATTCACTTTATTACTATGGTAACTGTTTTTTGTTGAAAAGTGTAATATATAAGAAAGAGTACTTGTAAATGTGTTCAGAACTCACTTTATATGCTTGAAGAGATGACAACTGAACTTCATTGGATCACTTCAGCTCC
>Nigeria18_Y3
CCAAAATGGTTGAGCTTTATGAATGTTTTCCCCAGATATCTAAGCAAATACGGCTTTCAGTTTTTGCTGCTTCATATATTTTAATTGGGTTTTTATTATCTTTTAATTATATTTTAATTGGTACAGTCATTATGAGTTTTCTGGACCAAATTCACTTTATTACTATGGTAACTGTTTTTTGTTGAAAAGTGTAATATATAAGAAAGAGTACTTGTAAATGTGTTCAGAACTCACTTTATATGCTTGAAGAGATGACAACTGAACTTCATTGGATCACTTAAGCTCC
>Nigeria6_Y3
CCAAAATGGTTGAGCTTTATGAATGTTTTCCCCAGATATCTAAGCAAATACGGCTTTCAGTTTTTGCTGCTTCATATATTTTAATTGGGTTTTTATTATCTTTTAATTATATTTTAATTGGTACAGTCATTATGAGTTTTCTGGACCAAATTCACTTTATTACTATGGTAACTGTTTTTTGTTGAAAAGTGTAATATATAAGAAAGAGTACTTGTAAATGTGTTCAGAACTCACTTTATATGCTTGAAGAGATGACAACTGAACTTCATTGGATCACTTAAGCTCC
>Nigeria42_Y3
CCAAAATGGTTGAGCTTTATGAATGTTTTCCCCAGATATCTAAGCAAATACGGCTTTCAGTTTTTGCTGCTTCATATATTTTAATTGGGTTTTTATTATCTTTTAATTATATTTTAATTGGTACAGTCATTATGAGTTTTCTGGACCAAATTCACTTTATTACTATGGTAACTGTTTTTTGTTGAAAAGTGTAATATATAAGAAAGAGTACTTGTAAATGTGTTCAGAACTCACTTTATATGCTTGAAGAGATGACAACAGTACTTCATTGGGACCTGTATGCTCC
>Nigeria41_Y3
CCAAAATGGTTGAGCTTTATGAATGTTTTCCCCAGATATCTAAGCAAATACGGCTTTCAGTTTTTGCTGCTTCATATATTTTAATTGGGTTTTTATTATCTTTTAATTATATTTTAATTGGTACAGTCATTATGAGTTTTCTGGACCAAATTCACTTTATTACTATGGTAACTGTTTTTTGTTGAAAAGTGTAATATATAAGAAAGAGTACTTGTAAATGTGTTCAGAACTCACTTTATATGCTTGAAGAGATGACAACTGAACTTCATTGGATCACTCATGCTCC
>Nigeria36_Y3
CCAAAATGGTTGAGCTTTATGAATGTTTTCCCCAGATATCTAAGCAAATACGGCTTTCAGTTTTTGCTGCTTCATATATTTTAATTGGGTTTTTATTATCTTTTAATTATATTTTAATTGGTACAGTCATTATGAGTTTTCTGGACCAAATTCACTTTATTACTATGGTAACTGTTTTTTGTTGAAAAGTGTAATATATAAGAAAGAGTACTTGTAAATGTGTTCAGAACTCACTTTATATGCTTGAAGAGATGACAACTGAACTTCATTGGATCACTAATGCTCC
>Nigeria27_Y3
CCAAAATGGTTGAGCTTTATGAATGTTTTCCCCAGATATCTAAGCAAATACGGCTTTCAGTTTTTGCTGCTTCATATATTTTAATTGGGTTTTTATTATCTTTTAATTATATTTTAATTGGTACAGTCATTATGAGTTTTCTGGACCAAATTCACTTTATTACTATGGTAACTGTTTTTTGTTGAAAAGTGTAATATATAAGAAAGAGTACTTGTAAATGTGTTCAGAACTCACTTTATATGCTTGAAGAGATGACAACTGAACTTCATTGGATCACCCAGGCTCC
>Nigeria38_Y3
CCAAAATGGTTGAGCTTTATGAATGTTTTCCCCAGATATCTAAGCAAATACGGCTTTCAGTTTTTGCTGCTTCATATATTTTAATTGGGTTTTTATTATCTTTTAATTATATTTTAATTGGTACAGTCATTATGAGTTTTCTGGACCAAATTCACTTTATTACTATGGTAACTGTTTTTTGTTGAAAAGTGTAATATATAAGAAAGAGTACTTGTAAATGTGTTCAGAACTCACTTTATATGCTTGAAGAGATGACAACTGAACTTCATTGGATCACTTATGCTCC
>Nigeria43_Y3
CCAAAATGGTTGAGCTTTATGAATGTTTTCCCCAGATATCTAAGCAAATACGGCTTTCAGTTTTTGCTGCTTCATATATTTTAATTGGGTTTTTATTATCTTTTAATTATATTTTAATTGGTACAGTCATTATGAGTTTTCTGGACCAAATTCACTTTATTACTATGGTAACTGTTTTTTGTTGAAAAGTGTAATATATAAGAAAGAGTACTTGTAAATGTGTTCAGAACTCACTTTATATGCTTGAAGAGATGACAACTGAACTTCATTGGATCACTTATGCTCC
>Nigeria10_Y3
CCAAAATGGTTGAGCTTTATGAATGTTTTCCCCAGATATCTAAGCAAATACGGCTTTCAGTTTTTGCTGCTTCATATATTTTAATTGGGTTTTTATTATCTTTTAATTATATTTTAATTGGTACAGTCATTATGAGTTTTCTGGACCAAATTCACTTTATTACTATGGTAACTGTTTTTTGTTGAAAAGTGTAATATATAAGAAAGAGTACTTGTAAATGTGTTCAGAACTCACTTTATATGCTTGAAGAGATGACAACTGAACTTCATTGGATCACTTATGCTCC
>Nigeria37_Y3
CCAAAATGGTTGAGCTTTATGAATGTTTTCCCCAGATATCTAAGCAAATACGGCTTTCAGTTTTTGCTGCTTCATATATTTTAATTGGGTTTTTATTATCTTTTAATTATATTTTAATTGGTACAGTCATTATGAGTTTTCTGGACCAAATTCACTTTATTACTATGGTAACTGTTTTTTGTTGAAAAGTGTAATATATAAGAAAGAGTACTTGTAAATGTGTTCAGAACTCACTTTATATGCTTGAAGAGATGACAACTGAACTTCATTGGATCACTTATGCTCC
>Nigeria34_Y3
CCAAAATGGTTGAGCTTTATGAATGTTTTCCCCAGATATCTAAGCAAATACGGCTTTCAGTTTTTGCTGCTTCATATATTTTAATTGGGTTTTTATTATCTTTTAATTATATTTTAATTGGTACAGTCATTATGAGTTTTCTGGACCAAATTCACTTTATTACTATGGTAACTGTTTTTTGTTGAAAAGTGTAATATATAAGAAAGAGTACTTGTAAATGTGTTCAGAACTCACTTTATATGCTTGAAGAGATGACAACTGAACTTCATTGGATCACTTATGCTCC
>Nigeria32_Y3
CCAAAATGGTTGAGCTTTATGAATGTTTTCCCCAGATATCTAAGCAAATACGGCTTTCAGTTTTTGCTGCTTCATATATTTTAATTGGGTTTTTATTATCTTTTAATTATATTTTAATTGGTACAGTCATTATGAGTTTTCTGGACCAAATTCACTTTATTACTATGGTAACTGTTTTTTGTTGAAAAGTGTAATATATAAGAAAGAGTACTTGTAAATGTGTTCAGAACTCACTTTATATGCTTGAAGAGATGACAACTGAACTTCATTGGATCACTTATGCTCC
>Nigeria25_Y3
CCAAAATGGTTGAGCTTTATGAATGTTTTCCCCAGATATCTAAGCAAATACGGCTTTCAGTTTTTGCTGCTTCATATATTTTAATTGGGTTTTTATTATCTTTTAATTATATTTTAATTGGTACAGTCATTATGAGTTTTCTGGACCAAATTCACTTTATTACTATGGTAACTGTTTTTTGTTGAAAAGTGTAATATATAAGAAAGAGTACTTGTAAATGTGTTCAGAACTCACTTTATATGCTTGAAGAGATGACAACTGAACTTCATTGGATCACTTATGCTCC
>Nigeria22_Y3
CCAAAATGGTTGAGCTTTATGAATGTTTTCCCCAGATATCTAAGCAAATACGGCTTTCAGTTTTTGCTGCTTCATATATTTTAATTGGGTTTTTATTATCTTTTAATTATATTTTAATTGGTACAGTCATTATGAGTTTTCTGGACCAAATTCACTTTATTACTATGGTAACTGTTTTTTGTTGAAAAGTGTAATATATAAGAAAGAGTACTTGTAAATGTGTTCAGAACTCACTTTATATGCTTGAAGAGATGACAACTGAACTTCATTGGATCACTTATGCTCC
>Nigeria20_Y3
CCAAAATGGTTGAGCTTTATGAATGTTTTCCCCAGATATCTAAGCAAATACGGCTTTCAGTTTTTGCTGCTTCATATATTTTAATTGGGTTTTTATTATCTTTTAATTATATTTTAATTGGTACAGTCATTATGAGTTTTCTGGACCAAATTCACTTTATTACTATGGTAACTGTTTTTTGTTGAAAAGTGTAATATATAAGAAAGAGTACTTGTAAATGTGTTCAGAACTCACTTTATATGCTTGAAGAGATGACAACTGAACTTCATTGGATCACTTATGCTCC
>Nigeria7_Y3
CCAAAATGGTTGAGCTTTATGAATGTTTTCCCCAGATATCTAAGCAAATACGGCTTTCAGTTTTTGCTGCTTCATATATTTTAATTGGGTTTTTATTATCTTTTAATTATATTTTAATTGGTACAGTCATTATGAGTTTTCTGGACCAAATTCACTTTATTACTATGGTAACTGTTTTTTGTTGAAAAGTGTAATATATAAGAAAGAGTACTTGTAAATGTGTTCAGAACTCACTTTATATGCTTGAAGAGATGACAACTGAACTTCATTGGATCACTTATGCTCC
>Nigeria12_Y3
CCAAAATGGTTGAGCTTTATGAATGTTTTCCCCAGATATCTAAGCAAATACGGCTTTCAGTTTTTGCTGCTTCATATATTTTAATTGGGTTTTTATTATCTTTTAATTATATTTTAATTGGTACAGTCATTATGAGTTTTCTGGACCAAATTCACTTTATTACTATGGTAACTGTTTTTTGTTGAAAAGTGTAATATATAAGAAAGAGTACTTGTAAATGTGTTCAGAACTCACTTTATATGCTTGAAGAGATGACAACTGAACTTCATTGGATCACTTATGCTCC
>Nigeria8_Y3
CCAAAATGGTTGAGCTTTATGAATGTTTTCCCCAGATATCTAAGCAAATACGGCTTTCAGTTTTTGCTGCTTCATATATTTTAATTGGGTTTTTATTATCTTTTAATTATATTTTAATTGGTACAGTCATTATGAGTTTTCTGGACCAAATTCACTTTATTACTATGGTAACTGTTTTTTGTTGAAAAGTGTAATATATAAGAAAGAGTACTTGTAAATGTGTTCAGAACTCACTTTATATGCTTGAAGAGATGACAACTGAACTTCATTGGATCACTTATGCTCC
