# Supplementary material for: Genetic variation of Nigerian cattle inferred from maternal and paternal genetic markers
Source: PeerJ journal article supplement (doi:10.7717/peerj.10607), 2021-03-05
Supplement: Supplemental_Figure_S4.pdf [file Supplemental_Figure_S4.pdf]

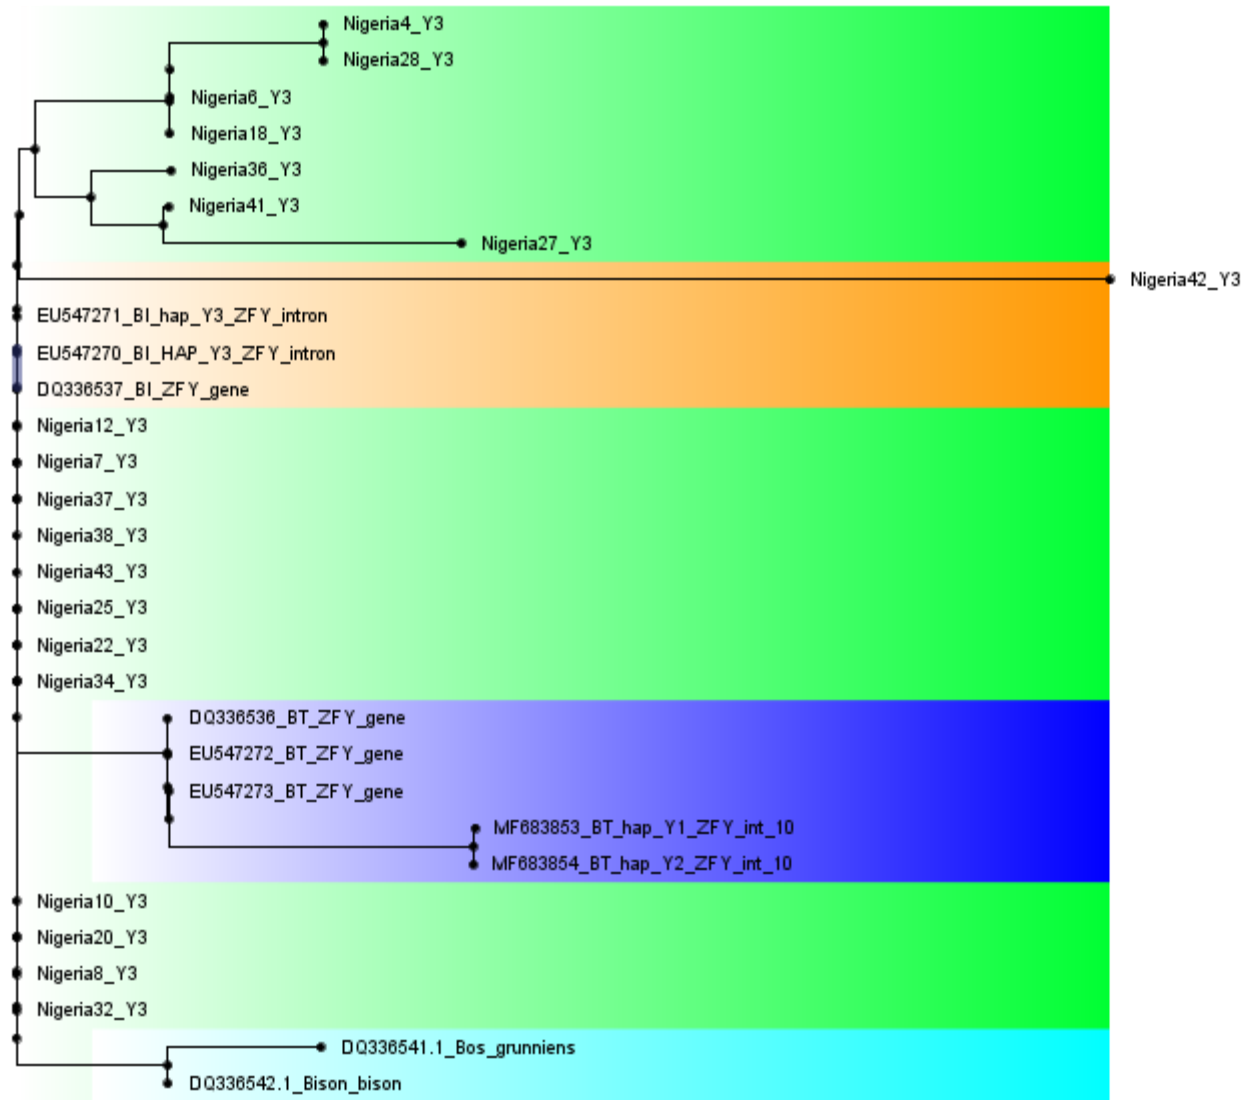

0.003
